# Supplementary material for: Prevalence of intimate partner violence against infertile women in low-income and middle-income countries: a systematic review and meta-analysis
Source: PubMed Central journal article supplement — Lancet Glob Health. 2022 May 10;10(6):e820–30. doi: 10.1016/S2214-109X(22)00098-5 (PMC9115867; doi:10.1016/s2214-109x(22)00098-5), 2022-05-10
Supplement: mmc1.pdf [file mmc1.pdf]

### Supplementary appendix 1

This translation in Chinese was submitted by the authors and we reproduce it as supplied. It has not been peer reviewed. *The Lancet's* editorial processes have only been applied to the original in English, which should serve as reference for this manuscript.

此简体中文译文由作者提交，我方按照提供的版本刊登。此译文并未经过同行审阅。医学期刊《柳叶刀》的编辑流程仅适用于英文原稿，英文原稿应作为此手稿的参考。

Supplement to: Wang Y, Fu Y, Ghazi P, et al. Prevalence of intimate partner violence against infertile women in low-income and middle-income countries: a systematic review and meta-analysis. *Lancet Glob Health* 2022; **10**: e820–30.

## 摘要

**背景** 不孕症和亲密伴侣暴力 (IPV) 是全球严重关切的问题, 但目前无论在全球范围或区域范围内均缺乏针对不孕妇女遭受IPV流行现状的定量数据。该研究旨在估计中低收入国家不孕妇女遭受IPV的流行率及其差异来源。

**方法** 我们对11个文献数据库进行了系统的文献检索 (从数据库创建日期截止到2021年9月30日), 并进行Meta分析估计不孕妇女遭受IPV的总患病率和95%置信区间(CI)。使用亚组分析和Meta回归分析来探讨不同研究时期 (2010年及以前vs2010年以后)、地区 (非洲、西亚、南亚和东亚)、不孕类型 (原发或继发)、偏倚风险 (高、中或低)、样本量 (连续型变量) 和测量工具 (修订版虐待调查问卷、世界卫生组织针对女性暴力调查问卷或修订冲突策略量表) 的流行率差异。PROSPERO注册号: CRD42021248448。

**结果** 在2661篇检索到的文献中 (2637篇来自数据库检索和24篇来自二次检索), 我们对120篇全文文献进行审查, 共鉴定出于2000-2019年期间在9个中低收入国家开展的30项相关研究, 其中25项研究符合Meta分析的纳入标准, 共包括7164名调查对象。不孕妇女在过去12个月内遭受IPV的流行率为36.0% (95% CI 20.4–55.2)、既往曾经遭受IPV的流行率为47.2% (31.7–63.3)。最常见的IPV类型是心理暴力, 过去12个月内的流行率为24.6% (11.3–45.6)、既往曾经的流行率为51.5% (38.8–64.0) (由于不同数据来源的问题, 该估计值略高于总暴力的流行率); 躯体暴力(11.9% [5.2–25.1] and 20.2% [12.1–31.7])、性暴力(8.7% [2.6–25.0] and 11.5% [6.1–20.7])和经济胁迫(2.6% [0.4–13.7] and 9.8% [5.7–16.5])。不孕女性既往曾经遭受IPV的流行率在不同研究时期( $R^2=39.46\%$ )、地区( $R^2=50.95\%$ )和测量工具( $R^2=54.27\%$ )上存在显著差异。

**结论** 尽管不同研究之间存在显著异质性, 不孕妇女遭受IPV的流行率高是一个显而易见的问题。应开展有针对性的IPV筛查、咨询和结构性干预措施, 以从社会多个层面解决这一紧迫问题。

**基金** 中华医学基金会和世界卫生组织。

**Copyright** 2022 ©The Author(s). Published by Elsevier Ltd. This is an Open Access article under the CC BY-NC-ND 4.0 license.
