# Supplementary material for: Prevalence of intimate partner violence against infertile women in low-income and middle-income countries: a systematic review and meta-analysis
Source: PubMed Central journal article supplement — Lancet Glob Health. 2022 May 10;10(6):e820–30. doi: 10.1016/S2214-109X(22)00098-5 (PMC9115867; doi:10.1016/s2214-109x(22)00098-5), 2022-05-10
Supplement: mmc2.pdf [file mmc2.pdf]

# THE LANCET

## Global Health

### Supplementary appendix 2

This appendix formed part of the original submission and has been peer reviewed. We post it as supplied by the authors.

Supplement to: Wang Y, Fu Y, Ghazi P, et al. Prevalence of intimate partner violence against infertile women in low-income and middle-income countries: a systematic review and meta-analysis. *Lancet Glob Health* 2022; **10**: e820–30.

## Search strategy used in each database

### PubMed (Controlled Vocabulary)

On October 19, 2021

Published by September 30, 2021

| Step | Searches                                                                                                                                                                                                                                                       | Results |
|------|----------------------------------------------------------------------------------------------------------------------------------------------------------------------------------------------------------------------------------------------------------------|---------|
| 1    | "Domestic Violence"[MeSH Terms] OR "Intimate Partner Violence"[MeSH Terms] OR "Gender-Based Violence"[MeSH Terms] OR "Torture"[MeSH Terms] OR "Physical Abuse"[MeSH Terms] OR "Emotional Abuse"[MeSH Terms] OR "Sex Offenses"[MeSH Terms] OR "Hostility"[Mesh] | 70,276  |
| 2    | "infertility"[MeSH]                                                                                                                                                                                                                                            | 69,132  |
| 3    | Step 1 AND Step 2                                                                                                                                                                                                                                              | 77      |

### PubMed (All Field Vocabulary)

On October 19, 2021

Published by September 30, 2021

| Step | Searches                                                                                               | Results   |
|------|--------------------------------------------------------------------------------------------------------|-----------|
| 1    | Violence OR Abuse OR Maltreatment OR Mistreatment                                                      | 492,795   |
| 2    | Spouse OR Spousal OR "Intimate Partner" OR Domestic OR Marital OR Family OR Familial OR "Gender Based" | 1,765,070 |
| 3    | Infertility OR Infertile OR Sterile OR sterility OR Infecundity OR Childlessness OR "fertility issue"  | 222,683   |
| 4    | Step 1 AND Step 2 AND Step 3                                                                           | 443       |

### PsycINFO [EBSCO](Controlled Vocabulary)

On October 19, 2021

Published by September 30, 2021

| Step | Searches                                                                                                                                                                                                    | Results |
|------|-------------------------------------------------------------------------------------------------------------------------------------------------------------------------------------------------------------|---------|
| 1    | DE "Dating Violence" OR DE "Intimate Partner Violence" OR DE "Sex Offenses" OR DE "Domestic Violence" OR DE "Emotional Abuse" OR DE "Physical Abuse" OR DE "Torture" OR DE "Verbal Abuse" OR DE "Hostility" | 51,854  |
| 2    | (DE "Infertility") OR (DE "Childlessness")                                                                                                                                                                  | 2,840   |
| 3    | Step 1 AND Step 2                                                                                                                                                                                           | 14      |

### PsycINFO [EBSCO] (All Text Vocabulary)

On October 19, 2021

Published by September 30, 2021

| Step | Searches                                                                                                                                                                           | Results |
|------|------------------------------------------------------------------------------------------------------------------------------------------------------------------------------------|---------|
| 1    | Violence* OR Abuse* OR Maltreatment OR Mistreatment                                                                                                                                | 325,894 |
| 2    | Spous* OR "Intimate Partner*" OR Domestic* OR Marital* OR Family OR Familial OR "Gender Based"                                                                                     | 599,802 |
| 3    | Infertility OR Infertile OR Sterile OR sterility OR Infecundity OR Childlessness OR "fertility issue"                                                                              | 6,683   |
| 4    | Step 1 AND Step 2 AND Step 3                                                                                                                                                       | 83      |
| 5    | TX("Domestic violence*" OR "intimate partner violence*" OR "domestic abuse*" OR "marital violence*" OR "spouse abuse*" OR "spousal violence*" OR "maltreatment" OR "mistreatment") | 43,861  |
| 6    | TX("Infertility" OR "infertile" OR "fertility issue*" OR "sterility" OR "sterile" OR "infecundity" OR "childlessness")                                                             | 6,738   |

|   |                   |           |
|---|-------------------|-----------|
| 7 | Step 5 AND Step 6 | <b>32</b> |
| 8 | Step 4 OR Step 7  | <b>87</b> |

CINAHL Plus [EBSCO] (All Field Vocabulary)

On October 16, 2021

Published by September 30, 2021

| Step | Searches                                                                                                                                                                     | Results   |
|------|------------------------------------------------------------------------------------------------------------------------------------------------------------------------------|-----------|
| 1    | (MH "Domestic Violence") OR (MH "Dating Violence") OR (MH "Gender-Based Violence") OR (MH "Torture") OR (MH "Verbal Abuse") OR (MH "Sexual Abuse") OR (MH "Emotional Abuse") | 20,994    |
| 2    | (MH "Infertility") OR (MH "Childlessness")                                                                                                                                   | 13,048    |
| 3    | Step 1 AND Step 2                                                                                                                                                            | <b>36</b> |

CINAHL Plus [EBSCO] (All Field Vocabulary)

On October 19, 2021

Published by September 30, 2021

| Step | Searches                                                                                                                                                                           | Results    |
|------|------------------------------------------------------------------------------------------------------------------------------------------------------------------------------------|------------|
| 1    | Violence* OR Abuse* OR Maltreatment OR Mistreatment                                                                                                                                | 173,013    |
| 2    | Spous* OR "Intimate Partner*" OR Domestic* OR Marital* OR Family OR Familial OR "Gender Based"                                                                                     | 453,699    |
| 3    | Infertility OR Infertile OR Sterile OR sterility OR Infecundity OR Childlessness OR "fertility issue*"                                                                             | 25,662     |
| 4    | Step 1 AND Step 2 AND Step 3                                                                                                                                                       | <b>83</b>  |
| 5    | TX("Domestic violence*" OR "intimate partner violence*" OR "domestic abuse*" OR "marital violence*" OR "spouse abuse*" OR "spousal violence*" OR "maltreatment" OR "mistreatment") | 44,872     |
| 6    | TX("Infertility" OR "infertile" OR "fertility issue*" OR "sterility" OR "sterile" OR "infecundity" OR "childlessness")                                                             | 67,058     |
| 7    | Step 5 AND Step 6                                                                                                                                                                  | <b>692</b> |
| 8    | Step 4 OR Step 7                                                                                                                                                                   | <b>725</b> |

EMBASE [Elsevier]

On October 19, 2021

Published by September 30, 2021

| Step | Searches                                                                                                                                                                                                                                      | Results          |
|------|-----------------------------------------------------------------------------------------------------------------------------------------------------------------------------------------------------------------------------------------------|------------------|
| 1    | 'domestic violence'/exp OR 'emotional abuse'/exp OR 'financial abuse'/exp OR 'physical abuse'/exp OR 'sexual abuse'/exp OR 'sexual crime'/exp OR 'gender based violence'/exp OR 'torture'/exp OR 'verbal hostility'/exp OR 'maltreatment'/exp | <b>92,394</b>    |
| 2    | 'infertility'/exp OR 'childlessness'/exp                                                                                                                                                                                                      | <b>139,873</b>   |
| 3    | Step 1 AND Step 2                                                                                                                                                                                                                             | <b>220</b>       |
| 4    | violence*:ti,ab,kw OR abuse*:ti,ab,kw OR maltreatment:ti,ab,kw OR mistreatment:ti,ab,kw                                                                                                                                                       | <b>254,654</b>   |
| 5    | spous*:ti,ab,kw OR 'intimate partner*':ti,ab,kw OR domestic*:ti,ab,kw OR marital*:ti,ab,kw OR family:ti,ab,kw OR familial:ti,ab,kw OR 'gender based':ti,ab,kw                                                                                 | <b>1,424,404</b> |
| 6    | infertility:ti,ab,kw OR infertile:ti,ab,kw OR sterile:ti,ab,kw OR sterility:ti,ab,kw OR infecundity:ti,ab,kw OR childlessness:ti,ab,kw OR 'fertility issue*':ti,ab,kw                                                                         | <b>186,191</b>   |
| 7    | Step 4 AND Step 5 AND Step 6                                                                                                                                                                                                                  | <b>160</b>       |
| 8    | Step 3 OR Step 7                                                                                                                                                                                                                              | <b>313</b>       |

**MEDLINE [Ovid]**

On October 19, 2021

Published by September 30, 2021

| Step | Searches                                                                                                                                                                                     | Results          |
|------|----------------------------------------------------------------------------------------------------------------------------------------------------------------------------------------------|------------------|
| 1    | exp domestic violence/ or exp gender-based violence/ or exp intimate partner violence/ or exp physical abuse/ or exp torture/ or exp emotional abuse/ or exp sex offenses/ or exp hostility/ | <b>70,257</b>    |
| 2    | exp Infertility/                                                                                                                                                                             | <b>69,120</b>    |
| 3    | Step 1 AND Step 2                                                                                                                                                                            | <b>77</b>        |
| 4    | (Violence* or Abuse* or Maltreatment or Mistreatment).mp.                                                                                                                                    | <b>247,386</b>   |
| 5    | (Spous* or Intimate Partner* or Domestic* or Marital* or Family or Familial or Gender Based).mp.                                                                                             | <b>1,337,151</b> |
| 6    | (Infertility or Infertile or Sterile or sterility or Infecundity or Childlessness or fertility issue*).mp.                                                                                   | <b>152,303</b>   |
| 7    | Step 4 AND Step 5 AND Step 6                                                                                                                                                                 | <b>153</b>       |
| 8    | Step 3 OR Step 7                                                                                                                                                                             | <b>195</b>       |

**WEB of SCIENCE (All Databases)**

On October 19, 2021

Published by September 30, 2021

| Step | Searches                                                                                                                                                                                                                                                                                       | Results    |
|------|------------------------------------------------------------------------------------------------------------------------------------------------------------------------------------------------------------------------------------------------------------------------------------------------|------------|
| 1    | "Domestic violence*" OR "intimate partner violence*" OR "domestic abuse*" OR "marital violence*" OR "spouse abuse*" OR "spousal violence*" OR "maltreatment" OR "mistreatment" OR "gender-based violence" OR "physical abuse" OR "emotional abuse" OR "sexual abuse" OR "verbal abuse" (Topic) | 101,775    |
| 2    | "Infertility" OR "infertile" OR "fertility issue*" OR "sterility" OR "sterile" OR "infecundity" OR "childlessness" (Topic)                                                                                                                                                                     | 633,535    |
| 3    | Step 1 AND Step 2                                                                                                                                                                                                                                                                              | <b>184</b> |
| 4    | "Violence*" OR "Abuse*" OR "Maltreatment" OR "Mistreatment" (Topic)                                                                                                                                                                                                                            | 593,744    |
| 5    | "Spous*" OR "Intimate Partner*" OR "Domestic*" OR "Marital*" OR "Family" OR "Familial" OR "Gender Based" (Topic)                                                                                                                                                                               | 4,304,255  |
| 6    | "Infertility" OR "infertile" OR "fertility issue*" OR "sterility" OR "sterile" OR "infecundity" OR "childlessness" (Topic)                                                                                                                                                                     | 633,535    |
| 7    | Step 4 AND Step 5 AND Step 6                                                                                                                                                                                                                                                                   | <b>284</b> |
| 8    | Step 3 OR Step 7                                                                                                                                                                                                                                                                               | <b>328</b> |

**ProQuest Dissertations & Theses Global**

On October 19, 2021

Published by September 30, 2021

| Step | Searches                                                                                                                         | Results  |
|------|----------------------------------------------------------------------------------------------------------------------------------|----------|
| 1    | mainsubject.Exact("adult abuse & neglect" OR "emotional abuse" OR "torture" OR "domestic violence" OR "violence" OR "Hostility") | 2,652    |
| 2    | mainsubject.Exact("childlessness" OR "infertility")                                                                              | 275      |
| 3    | Step 1 AND Step 2                                                                                                                | <b>1</b> |
| 4    | AB, TI, IF(Violence* OR Abuse* OR Maltreatment OR Mistreatment)                                                                  | 70,029   |
| 5    | AB, TI, IF(Spous* OR "Intimate Partner*" OR Domestic* OR Marital* OR Family OR Familial OR "Gender Based")                       | 356,015  |
| 6    | AB, TI, IF(Infertility OR Infertile OR Sterile OR sterility OR Infecundity OR Childlessness OR "fertility issue*")               | 9,055    |

|   |                              |    |
|---|------------------------------|----|
| 7 | Step 4 AND Step 5 AND Step 6 | 24 |
| 8 | Step 3 OR Step 7             | 24 |

ProQuest International Bibliography of the Social Sciences

On October 19, 2021

Published by September 30, 2021

| Step | Searches                                                                                                                                                                                                                                                                                                                                                                                               | Results |
|------|--------------------------------------------------------------------------------------------------------------------------------------------------------------------------------------------------------------------------------------------------------------------------------------------------------------------------------------------------------------------------------------------------------|---------|
| 1    | mainsubject.Exact("adult abuse & neglect" OR "emotional abuse" OR "physical abuse" OR "abuse" OR "verbal abuse" OR "marital rape" OR "violence against women" OR "adult abuse neglect" OR "hostility" OR "spouse abuse" OR "sexual abuse" OR "abuse of women" OR "abused women" OR "adult abuse" OR "domestic abuse" OR "torture" OR "intimate partner violence" OR "domestic violence" OR "violence") | 65,350  |
| 2    | mainsubject.Exact("sterility" OR "childlessness" OR "infertility, male" OR "infertility" OR "infertility, female")                                                                                                                                                                                                                                                                                     | 1,509   |
| 3    | Step 1 AND Step 2                                                                                                                                                                                                                                                                                                                                                                                      | 27      |
| 4    | AB, TI, IF (Violence* OR Abuse* OR Maltreatment OR Mistreatment)                                                                                                                                                                                                                                                                                                                                       | 87,129  |
| 5    | AB, TI, IF (Spous* OR "Intimate Partner*" OR Domestic* OR Marital* OR Family OR Familial OR "Gender Based")                                                                                                                                                                                                                                                                                            | 245,590 |
| 6    | AB, TI, IF (Infertility OR Infertile OR Sterile OR sterility OR Infecundity OR Childlessness OR "fertility issue*")                                                                                                                                                                                                                                                                                    | 2,327   |
| 7    | Step 4 AND Step 5 AND Step 6                                                                                                                                                                                                                                                                                                                                                                           | 18      |
| 8    | Step 3 OR Step 7                                                                                                                                                                                                                                                                                                                                                                                       | 42      |

Chinese Wanfang Database (All Databases)

Including China Online Journals, Dissertations of China (DOC), Academic Conferences in China (ACIC), Chinese Patents, Chinese Standards, Chinese Companies & Products, Policies and Laws of China (PLOC), Chinese Scientific Institutes, New China Local Gazetteers.

On October 20, 2021

Published by September 30, 2021

| Step | Searches (Professional search)                                                                                                                                                                                                                                                                                                                                                                                                                                                                                                                                    | Results |
|------|-------------------------------------------------------------------------------------------------------------------------------------------------------------------------------------------------------------------------------------------------------------------------------------------------------------------------------------------------------------------------------------------------------------------------------------------------------------------------------------------------------------------------------------------------------------------|---------|
| 1    | (主题="不孕" OR 主题="不育" OR 主题="生育障碍" OR 主题="生育问题" OR 主题="生殖健康" OR 主题="infertility" OR 主题="infertile" OR 主题="sterile" OR 主题="sterility" OR 主题="infecundity" OR 主题="childlessness" OR 主题="fertility issue") AND (主题="配偶" OR 主题="伴侣" OR 主题="家庭" OR 主题="婚姻" OR 主题="妻子" OR 主题="spouse" OR 主题="intimate partner" OR 主题="domestic" OR 主题="marital" OR 主题="family" OR 主题="familial" OR 主题="gender based") AND (主题="暴力" OR 主题="虐待" OR 主题="虐妻" OR 主题="施暴" OR 主题="强奸" OR 主题="殴打" OR 主题="侮辱" OR 主题="谩骂" OR 主题="violence" OR 主题="abuse" OR 主题="maltreatment" OR 主题="mistreatment") | 190     |

主题--- Indicates title, keyword and abstract

Chinese CNKI Database

Including Journal, Thesis & Dissertation, Proceedings, Newspaper, Yearbook, Monographic Serials, Patents, Standards.

On October 20, 2021

Published by September 30, 2021

Limits: Chinese only

| Step | Searches (Professional search)                                                                                                                                                                                                                                                                                                        | Results |
|------|---------------------------------------------------------------------------------------------------------------------------------------------------------------------------------------------------------------------------------------------------------------------------------------------------------------------------------------|---------|
| 1    | TKA=(暴力+虐待+虐妻+施暴+强奸+殴打+辱骂+谩骂<br>+'violence'+abuse'+maltreatment'+mistreatment)*('配偶'+伴侣<br>+'家庭'+婚姻'+妻子'+spouse'+intimate<br>partner'+domestic'+marital'+family'+familial'+gender based)*('不<br>孕'+不育'+生育障碍'+生育问题'+生殖健康<br>+'infertility'+infertile'+sterile'+sterility'+infecundity'+childlessn<br>ess'+fertility issue)<br>限定: 中文文献 | 123     |

TKA --- Indicates title, keyword and abstract

SU --- Indicates subject words

#### China Biology Medicine Database (CBM)

CBM contains nearly 3000 Chinese biomedical journals, as well as literature records of compilation and conference papers. It is an important tool for retrieving Chinese medical literatures.

On October 20, 2021

Published by September 30, 2021

| Step | Searches                                                                                                                                                                                                                                                                             | Results |
|------|--------------------------------------------------------------------------------------------------------------------------------------------------------------------------------------------------------------------------------------------------------------------------------------|---------|
| 1    | "家庭暴力"[不加权:扩展] OR "亲密伴侣暴力"[不加权:扩展]<br>OR "身体虐待"[不加权:扩展] OR "暴力遭遇"[不加权:扩展] OR<br>"强奸"[不加权:扩展] OR "虐待"[不加权:扩展]                                                                                                                                                                         | 1376    |
| 2    | "不育"[不加权:扩展] OR "生殖健康"[不加权:扩展]                                                                                                                                                                                                                                                       | 46794   |
| 3    | Step 1 AND Step 2                                                                                                                                                                                                                                                                    | 4       |
| 4    | "暴力"[常用字段:智能] OR "虐待"[常用字段:智能] OR "虐妻"<br>"[常用字段:智能] OR "施暴"[常用字段:智能] OR "强奸"[常用<br>字段:智能] OR "殴打"[常用字段:智能] OR "侮辱"[常用字段:智<br>能] OR "谩骂"[常用字段:智能] OR violence% [常用字段:智能]<br>OR abuse% [常用字段:智能] OR maltreatment[常用字段:智能]<br>OR mistreatment[常用字段:智能]                                 | 10692   |
| 5    | "配偶"[常用字段:智能] OR "伴侣"[常用字段:智能] OR "家庭"<br>"[常用字段:智能] OR "婚姻"[常用字段:智能] OR "妻子"[常用<br>字段:智能] OR spous% [常用字段:智能] OR intimate partner% [常<br>用字段:智能] OR domestic% [常用字段:智能] OR marital% [常用<br>字段:智能] OR family[常用字段:智能] OR familial[常用字段:智<br>能] OR gender based[常用字段:智能]              | 221018  |
| 6    | "不孕"[常用字段:智能] OR "不育"[常用字段:智能] OR "生育障<br>碍"[常用字段:智能] OR "生育问题"[常用字段:智能] OR "生殖<br>健康"[常用字段:智能] OR infertility[常用字段:智能] OR<br>infertile[常用字段:智能] OR sterile[常用字段:智能] OR<br>sterility[常用字段:智能] OR infecundity[常用字段:智能] OR<br>childlessness[常用字段:智能] OR fertility issue% [常用字段:智<br>能] | 68114   |
| 7    | Step 4 AND Step 5 AND Step 6                                                                                                                                                                                                                                                         | 38      |
| 8    | Step 3 OR Step 7                                                                                                                                                                                                                                                                     | 40      |

[不加权:扩展]--- Indicates Controlled Vocabulary

[常用字段:智能] --- Indicates title, abstract, keyword and subject word

**Table S1: PRISMA (Preferred Reporting Items for Systematic Reviews and Meta-Analyses) checklist<sup>1</sup> of this review**

| Section and Topic             | Item # | Checklist item                                                                                                                                                                                                                                                                                       | Location where item is reported |
|-------------------------------|--------|------------------------------------------------------------------------------------------------------------------------------------------------------------------------------------------------------------------------------------------------------------------------------------------------------|---------------------------------|
| <b>TITLE</b>                  |        |                                                                                                                                                                                                                                                                                                      |                                 |
| Title                         | 1      | Identify the report as a systematic review.                                                                                                                                                                                                                                                          | Page 1                          |
| <b>ABSTRACT</b>               |        |                                                                                                                                                                                                                                                                                                      |                                 |
| Abstract                      | 2      | See the PRISMA 2020 for Abstracts checklist.                                                                                                                                                                                                                                                         | Page 3-4                        |
| <b>INTRODUCTION</b>           |        |                                                                                                                                                                                                                                                                                                      |                                 |
| Rationale                     | 3      | Describe the rationale for the review in the context of existing knowledge.                                                                                                                                                                                                                          | Page 7-8                        |
| Objectives                    | 4      | Provide an explicit statement of the objective(s) or question(s) the review addresses.                                                                                                                                                                                                               | Page 8                          |
| <b>METHODS</b>                |        |                                                                                                                                                                                                                                                                                                      |                                 |
| Eligibility criteria          | 5      | Specify the inclusion and exclusion criteria for the review and how studies were grouped for the syntheses.                                                                                                                                                                                          | Page 8-9, Figure 1              |
| Information sources           | 6      | Specify all databases, registers, websites, organisations, reference lists and other sources searched or consulted to identify studies. Specify the date when each source was last searched or consulted.                                                                                            | Page 8-9                        |
| Search strategy               | 7      | Present the full search strategies for all databases, registers and websites, including any filters and limits used.                                                                                                                                                                                 | Page 8-9, Appendix 2            |
| Selection process             | 8      | Specify the methods used to decide whether a study met the inclusion criteria of the review, including how many reviewers screened each record and each report retrieved, whether they worked independently, and if applicable, details of automation tools used in the process.                     | Page 9                          |
| Data collection process       | 9      | Specify the methods used to collect data from reports, including how many reviewers collected data from each report, whether they worked independently, any processes for obtaining or confirming data from study investigators, and if applicable, details of automation tools used in the process. | Page 9-10                       |
| Data items                    | 10a    | List and define all outcomes for which data were sought. Specify whether all results that were compatible with each outcome domain in each study were sought (e.g. for all measures, time points, analyses), and if not, the methods used to decide which results to collect.                        | Page 9-12                       |
|                               | 10b    | List and define all other variables for which data were sought (e.g. participant and intervention characteristics, funding sources). Describe any assumptions made about any missing or unclear information.                                                                                         | Page 9-12                       |
| Study risk of bias assessment | 11     | Specify the methods used to assess risk of bias in the included studies, including details of the tool(s) used, how many reviewers assessed each study and whether they worked independently, and if applicable, details of automation tools used in the process.                                    | Page 10                         |
| Effect measures               | 12     | Specify for each outcome the effect measure(s) (e.g. risk ratio, mean difference) used in the synthesis or presentation of results.                                                                                                                                                                  | Page 11-12                      |

| Section and Topic             | Item # | Checklist item                                                                                                                                                                                                                                              | Location where item is reported |
|-------------------------------|--------|-------------------------------------------------------------------------------------------------------------------------------------------------------------------------------------------------------------------------------------------------------------|---------------------------------|
| Synthesis methods             | 13a    | Describe the processes used to decide which studies were eligible for each synthesis (e.g. tabulating the study intervention characteristics and comparing against the planned groups for each synthesis (item #5)).                                        | Page 11-12                      |
|                               | 13b    | Describe any methods required to prepare the data for presentation or synthesis, such as handling of missing summary statistics, or data conversions.                                                                                                       | Page 11-12                      |
|                               | 13c    | Describe any methods used to tabulate or visually display results of individual studies and syntheses.                                                                                                                                                      | Page 11-12                      |
|                               | 13d    | Describe any methods used to synthesize results and provide a rationale for the choice(s). If meta-analysis was performed, describe the model(s), method(s) to identify the presence and extent of statistical heterogeneity, and software package(s) used. | Page 11-12                      |
|                               | 13e    | Describe any methods used to explore possible causes of heterogeneity among study results (e.g. subgroup analysis, meta-regression).                                                                                                                        | Page 11-12                      |
|                               | 13f    | Describe any sensitivity analyses conducted to assess robustness of the synthesized results.                                                                                                                                                                | Page 11-12                      |
| Reporting bias assessment     | 14     | Describe any methods used to assess risk of bias due to missing results in a synthesis (arising from reporting biases).                                                                                                                                     | Page 11-12                      |
| Certainty assessment          | 15     | Describe any methods used to assess certainty (or confidence) in the body of evidence for an outcome.                                                                                                                                                       | Page 11-12                      |
| <b>RESULTS</b>                |        |                                                                                                                                                                                                                                                             |                                 |
| Study selection               | 16a    | Describe the results of the search and selection process, from the number of records identified in the search to the number of studies included in the review, ideally using a flow diagram.                                                                | Page 12-13, Figure 1            |
|                               | 16b    | Cite studies that might appear to meet the inclusion criteria, but which were excluded, and explain why they were excluded.                                                                                                                                 | Page 12-13                      |
| Study characteristics         | 17     | Cite each included study and present its characteristics.                                                                                                                                                                                                   | Page 12-13, Table 1             |
| Risk of bias in studies       | 18     | Present assessments of risk of bias for each included study.                                                                                                                                                                                                | Page 13-14, Table 1             |
| Results of individual studies | 19     | For all outcomes, present, for each study: (a) summary statistics for each group (where appropriate) and (b) an effect estimate and its precision (e.g. confidence/credible interval), ideally using structured tables or plots.                            | Table 1                         |
| Results of syntheses          | 20a    | For each synthesis, briefly summarise the characteristics and risk of bias among contributing studies.                                                                                                                                                      | Page 14-15, Figure 2-3, Table 1 |



| Section and Topic                              | Item # | Checklist item                                                                                                                                                                                                                                                                       | Location where item is reported       |
|------------------------------------------------|--------|--------------------------------------------------------------------------------------------------------------------------------------------------------------------------------------------------------------------------------------------------------------------------------------|---------------------------------------|
|                                                | 20b    | Present results of all statistical syntheses conducted. If meta-analysis was done, present for each the summary estimate and its precision (e.g. confidence/credible interval) and measures of statistical heterogeneity. If comparing groups, describe the direction of the effect. | Page 14-15, Figure 2-3, Appendix 7-18 |
|                                                | 20c    | Present results of all investigations of possible causes of heterogeneity among study results.                                                                                                                                                                                       | Page 14-15, Appendix 7-18             |
|                                                | 20d    | Present results of all sensitivity analyses conducted to assess the robustness of the synthesized results.                                                                                                                                                                           | Page 14-15, Appendix 7-18             |
| Reporting biases                               | 21     | Present assessments of risk of bias due to missing results (arising from reporting biases) for each synthesis assessed.                                                                                                                                                              | Page 14-15, Appendix 7-18             |
| Certainty of evidence                          | 22     | Present assessments of certainty (or confidence) in the body of evidence for each outcome assessed.                                                                                                                                                                                  | Page 14-15, Appendix 7-18             |
| <b>DISCUSSION</b>                              |        |                                                                                                                                                                                                                                                                                      |                                       |
| Discussion                                     | 23a    | Provide a general interpretation of the results in the context of other evidence.                                                                                                                                                                                                    | Page 16-20                            |
|                                                | 23b    | Discuss any limitations of the evidence included in the review.                                                                                                                                                                                                                      | Page 16-20                            |
|                                                | 23c    | Discuss any limitations of the review processes used.                                                                                                                                                                                                                                | Page 20                               |
|                                                | 23d    | Discuss implications of the results for practice, policy, and future research.                                                                                                                                                                                                       | Page 16-20                            |
| <b>OTHER INFORMATION</b>                       |        |                                                                                                                                                                                                                                                                                      |                                       |
| Registration and protocol                      | 24a    | Provide registration information for the review, including register name and registration number, or state that the review was not registered.                                                                                                                                       | Page 3, 8                             |
|                                                | 24b    | Indicate where the review protocol can be accessed, or state that a protocol was not prepared.                                                                                                                                                                                       | Page 3, 8                             |
|                                                | 24c    | Describe and explain any amendments to information provided at registration or in the protocol.                                                                                                                                                                                      | NA                                    |
| Support                                        | 25     | Describe sources of financial or non-financial support for the review, and the role of the funders or sponsors in the review.                                                                                                                                                        | Page 4, 12, 21                        |
| Competing interests                            | 26     | Declare any competing interests of review authors.                                                                                                                                                                                                                                   | Page 20                               |
| Availability of data, code and other materials | 27     | Report which of the following are publicly available and where they can be found: template data collection forms; data extracted from included studies; data used for all analyses; analytic code; any other materials used in the review.                                           | Page 21, Supplementary file           |

**Table S2: The 10-item Hoy Risk of Bias Tool<sup>2</sup>**

| <b>Scoring standard for each item: 1 point = low risk; 0 point = high risk</b> |    |                                                                                                                                                                           | <b>Score</b> |
|--------------------------------------------------------------------------------|----|---------------------------------------------------------------------------------------------------------------------------------------------------------------------------|--------------|
| <b>External validity</b>                                                       | 1  | Was the study's target population a close representation of the national population (subnational or city) in relation to relevant variables such as age, sex, occupation? |              |
|                                                                                | 2  | Was the sampling frame a true or close representation of the target population?                                                                                           |              |
|                                                                                | 3  | Was some form of random selection used to select the sample, or was a census undertaken?                                                                                  |              |
|                                                                                | 4  | Was the likelihood of non-response bias minimal?                                                                                                                          |              |
| <b>Internal validity</b>                                                       | 5  | Were data collected directly from the subjects (as opposed to a proxy)?                                                                                                   |              |
|                                                                                | 6  | Was an acceptable case definition used in the study?                                                                                                                      |              |
|                                                                                | 7  | Was the study instrument that measured the parameter of interest shown to have reliability and validity (if necessary)?                                                   |              |
|                                                                                | 8  | Was the same mode of data collection used for all subjects?                                                                                                               |              |
|                                                                                | 9  | Was the length of the shortest prevalence period for the parameter of interest appropriate?                                                                               |              |
|                                                                                | 10 | Were the numerator(s) and denominator(s) for the parameter of interest appropriate?                                                                                       |              |
| <b>Total score</b>                                                             |    |                                                                                                                                                                           |              |

**Table S3: Agreement on 30 eligible references for systematic review across the two reviewers on each item in the 10-item literature quality assessment tool**

| <b>Item Number</b> | <b>Kappa</b> | <b>Agreement (%)</b> |
|--------------------|--------------|----------------------|
| 1                  | 0.714        | 93.33%               |
| 2                  | 0.737        | 90.00%               |
| 3                  | 0.737        | 90.00%               |
| 4                  | 0.866        | 93.33%               |
| 5                  | 1.000        | 100.00%              |
| 6                  | 1.000        | 100.00%              |
| 7                  | 0.783        | 96.67%               |
| 8                  | 1.000        | 100.00%              |
| 9                  | 1.000        | 100.00%              |
| 10                 | 1.000        | 100.00%              |
| <b>Mean</b>        | <b>0.884</b> | <b>96.33%</b>        |

**Table S4: Score value of each article rated by the two reviewers**

| Article                                         | Reviewer 1 | Reviewer 2 | Mean | Risk of bias |
|-------------------------------------------------|------------|------------|------|--------------|
| Leung et al., 2005 <sup>3</sup>                 | 6          | 6          | 6    | High         |
| Sami and Ali, 2006 <sup>4</sup>                 | 6          | 6          | 6    | High         |
| Li et al., 2005 <sup>5</sup>                    | 10         | 10         | 10   | Low          |
| Guo et al., 2006 <sup>6</sup>                   | 10         | 10         | 10   | Low          |
| Yildizhan et al., 2009 <sup>7</sup>             | 6          | 6          | 6    | High         |
| Dhont et al., 2011 <sup>8</sup>                 | 9          | 10         | 9.5  | Low          |
| Omoaregba et al., 2011 <sup>9</sup>             | 6          | 6          | 6    | High         |
| Edirne et al., 2010 <sup>10</sup>               | 6          | 6          | 6    | High         |
| Ardabily et al., 2011 <sup>11</sup>             | 6          | 6          | 6    | High         |
| Aduloju et al., 2015 <sup>12</sup>              | 6          | 6          | 6    | High         |
| Farzadi et al., 2014 <sup>13</sup>              | 6          | 6          | 6    | High         |
| Iliyasu et al., 2016 <sup>14</sup>              | 9          | 9          | 9    | Low          |
| Sahin et al., 2018 <sup>15</sup>                | 7          | 8          | 7.5  | Moderate     |
| Satheesan and Satyanarayana, 2018 <sup>16</sup> | 7          | 7          | 7    | Moderate     |
| Akpınar et al., 2019 <sup>17</sup>              | 6          | 6          | 6    | High         |
| Rahebi et al., 2019 <sup>18</sup>               | 9          | 8          | 8.5  | Moderate     |
| Alijani et al., 2019 <sup>19</sup>              | 6          | 6          | 6    | High         |
| Bondade et al., 2018 <sup>20</sup>              | 6          | 8          | 7    | Moderate     |
| Sis Çelik and Kırca, 2018 <sup>21</sup>         | 10         | 9          | 9.5  | Low          |
| Ghoneim et al., 2021 <sup>22</sup>              | 7          | 7          | 7    | Moderate     |
| Poornowrooz et al., 2019 <sup>23</sup>          | 6          | 6          | 6    | High         |
| Coşkun Potur et al., 2019 <sup>24</sup>         | 7          | 9          | 8    | Moderate     |
| Ghaly et al., 2019 <sup>25</sup>                | 6          | 6          | 6    | High         |
| Silwal and Thapa, 2020 <sup>26</sup>            | 7          | 6          | 6.5  | High         |
| Nabi et al., 2020 <sup>27</sup>                 | 7          | 7          | 7    | Moderate     |
| Akyüz et al., 2013 <sup>28</sup>                | 7          | 7          | 7    | Moderate     |
| Akyüz et al., 2014 <sup>29</sup>                | 7          | 7          | 7    | Moderate     |
| Taebi et al., 2016 <sup>30</sup>                | 6          | 6          | 6    | High         |
| Sheikhan et al., 2014 <sup>31</sup>             | 6          | 6          | 6    | High         |
| Mansour and Mohdy, 2018 <sup>32</sup>           | 6          | 6          | 6    | High         |

Studies with a mean score of  $\geq 9$ ,  $\geq 7$  and  $< 9$ , and  $< 7$  points were considered to have low, moderate, and high risk of bias, respectively.

**Table S5: Nine assessment tools used in the selected studies included in systematic review**

| Assessment tool                                                                | Description                                                                                                                                                                                                                                                                                                                                                                                                                                                                                                                                |
|--------------------------------------------------------------------------------|--------------------------------------------------------------------------------------------------------------------------------------------------------------------------------------------------------------------------------------------------------------------------------------------------------------------------------------------------------------------------------------------------------------------------------------------------------------------------------------------------------------------------------------------|
| Abuse Assessment Screen <sup>3,7,12,17</sup>                                   | This is a five-item questionnaire to identify current or previous physical, sexual, and psychological abuse perpetrated against women or men.                                                                                                                                                                                                                                                                                                                                                                                              |
| Infertile Women's Exposure to Violence Determination Scale <sup>21,24,25</sup> | The 5-point Likert-type scale consists of 31 items and five subscales: domestic violence (11 items), social pressure (7 items), punishment (6 items), exposure to traditional practices (4 items), and exclusion (3 items). Each item is scored ranging from 1-never, to 5-all the time. The total score of the full scale and each subscale is calculated by adding up points from each item. For the full scale, the minimum score that can be attained is 31, while the maximum is 155. A higher score means more exposure to violence. |
| WHO violence against women instrument <sup>18,20,27</sup>                      | This instrument was developed for use in the WHO Multi-country Study on Women's Health and Domestic Violence against Women. Questions on partner violence measures aspects of controlling behaviors, emotional abuse, physical violence, and sexual violence.                                                                                                                                                                                                                                                                              |
| Revised Conflict Tactics Scales <sup>11,14,19</sup>                            | This is 78-item scale that assesses both victimization and perpetration. The 39-item victimization scale includes 5 subscales that measure the frequency of physical assault, psychological aggression, sexual coercion, negotiation, and injury between partners.                                                                                                                                                                                                                                                                         |
| Scale for marital violence against women <sup>28,29</sup>                      | This is 50 items instrument developed for the Turkish population. It includes five subgroups: physical violence, emotional violence, verbal violence, economic violence, and sexual violence. The total score indicates the level of marital violence against the women. The SMVW consists of positive and negative statements. Positive statements are scored between 1 (never), 2 (sometimes) and 3 (always), while negative statements are scored in reverse. Participants                                                              |
| Partner Abuse Scale: Non-physical <sup>30</sup>                                | were asked to indicate the statement most appropriate to themselves. The minimum score is 50, and the maximum is 150. PASNP is a 25-item tool that measure the degree or severity of non-physical behavioral abuse delivered to the clients by their spouse or partner. The scale produces scores that range from 0 to 100.                                                                                                                                                                                                                |
| Domestic Violence Questionnaire <sup>16</sup>                                  | This is an open-ended question which covers following themes: women's power within marriage and implications for health, types of domestic conflict, and violence-related triggers, sources of support, and community norms.                                                                                                                                                                                                                                                                                                               |
| NorVold Domestic Abuse Questionnaire <sup>22</sup>                             | The NORAQ measures four types of abuse: emotional, physical, sexual, and violence in the healthcare system. The content of the questions ranged from mild to severe lifetime abuse.                                                                                                                                                                                                                                                                                                                                                        |
| Domestic Violence Inventory <sup>23</sup>                                      | This questionnaire has been used to measure spouse abuse in women and evaluate three dimensions of violence: physical, sexual and emotional violence. This questionnaire consists of 36 items covering 12 items in physical violence, 9 items in sexual violence and 15 items in emotional violence.                                                                                                                                                                                                                                       |

**Figure S1: Funnel plots and Egger's tests of past-12-month IPV prevalence**

**(A) Overall violence**

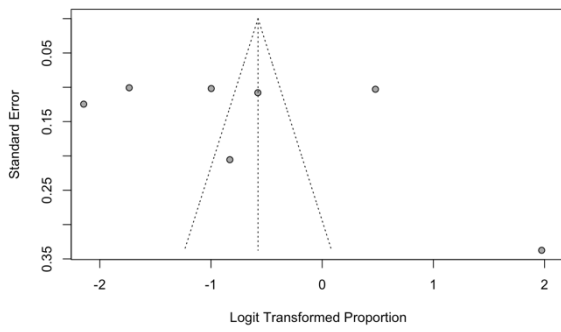

|              | Intercept | t    | p    |
|--------------|-----------|------|------|
| Egger's test | 6.66      | 0.61 | 0.57 |

**(B) Psychological violence**

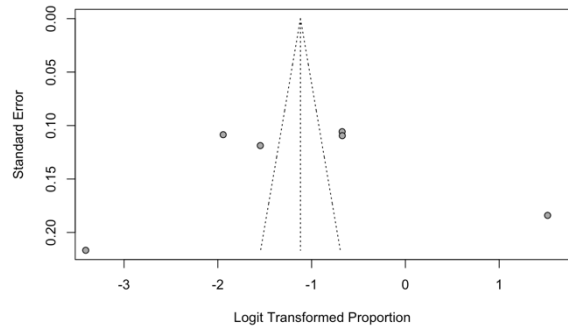

|              | Intercept | t    | p    |
|--------------|-----------|------|------|
| Egger's test | 0.38      | 0.02 | 0.98 |

**(C) Physical violence**

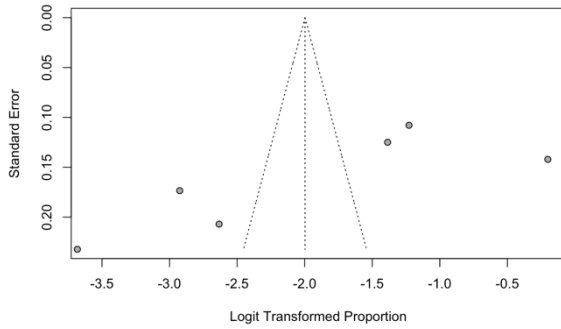

|              | Intercept | t     | p    |
|--------------|-----------|-------|------|
| Egger's test | -19.36    | -2.19 | 0.09 |

**(D) Sexual violence**

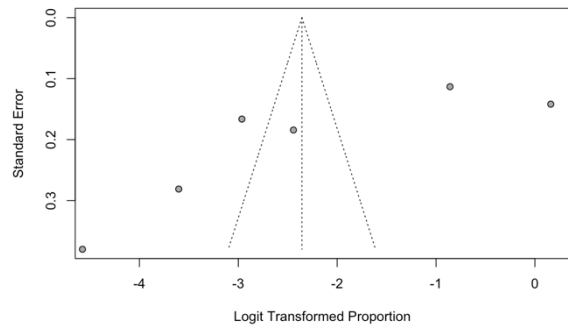

|              | Intercept | t     | p    |
|--------------|-----------|-------|------|
| Egger's test | -17.58    | -2.30 | 0.08 |

**(E) Economic coercion**

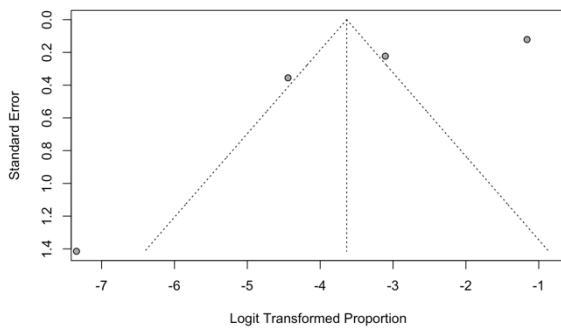

|              | Intercept | t     | p    |
|--------------|-----------|-------|------|
| Egger's test | -8.58     | -2.18 | 0.16 |

**Figure S2: Funnel plots and Egger's tests of lifetime IPV prevalence**

**(A) Overall violence**

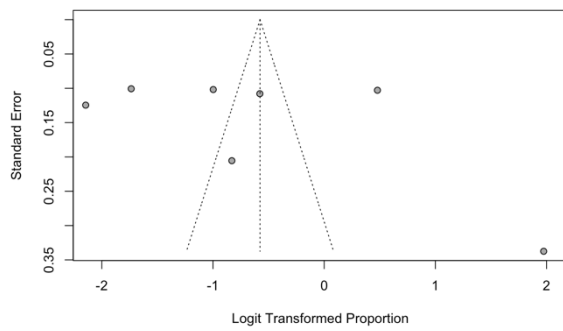

|              | Intercept | t     | p    |
|--------------|-----------|-------|------|
| Egger's test | -10.39    | -1.84 | 0.10 |

**(B) Psychological violence**

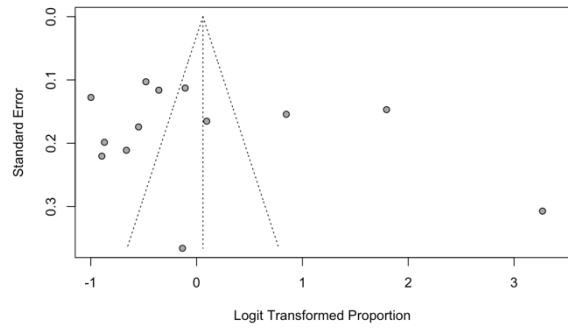

|              | Intercept | t    | p    |
|--------------|-----------|------|------|
| Egger's test | 4.52      | 0.85 | 0.41 |

**(C) Physical violence**

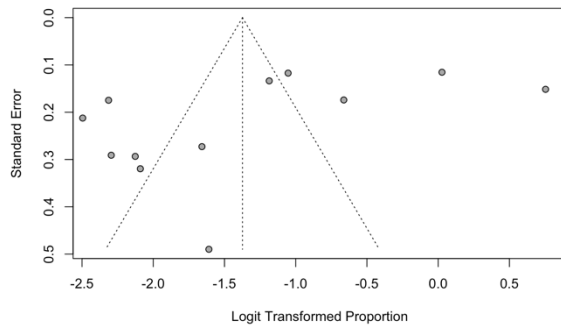

|              | Intercept | t     | p    |
|--------------|-----------|-------|------|
| Egger's test | -7.89     | -1.96 | 0.08 |

**(D) Sexual violence**

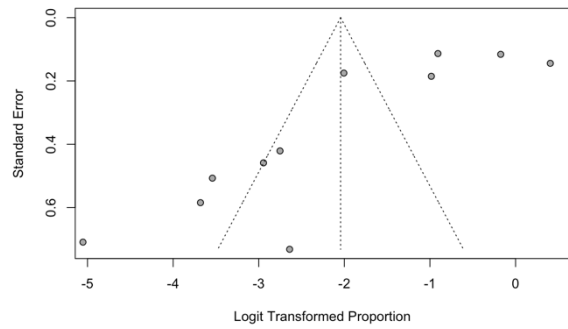

|              | Intercept | t     | p    |
|--------------|-----------|-------|------|
| Egger's test | -6.88     | -3.34 | 0.01 |

**Table S6: IPV prevalence in past 12 months by calendar year (before and after 2010)**

|                                                 | Statistics for each study |                    |
|-------------------------------------------------|---------------------------|--------------------|
|                                                 | Prevalence estimate       | 95% CI             |
| <b>2010 and before</b>                          |                           |                    |
| <i>Overall violence</i>                         |                           |                    |
| Li et al., 2005 <sup>5</sup>                    | 0.105                     | 0.083-0.130        |
| Guo et al., 2006 <sup>6</sup>                   | 0.269                     | 0.231-0.311        |
| Edirne et al., 2010 <sup>10</sup>               | 0.878                     | 0.787-0.940        |
| Ardabily et al., 2011 <sup>11</sup>             | 0.618                     | 0.568-0.665        |
| <b>Subgroup total (<math>I^2=99.1\%</math>)</b> | <b>0.450</b>              | <b>0.175-0.760</b> |
| <i>Psychological violence</i>                   |                           |                    |
| Li et al., 2005 <sup>5</sup>                    | 0.032                     | 0.020-0.048        |
| Guo et al., 2006 <sup>6</sup>                   | 0.176                     | 0.143-0.212        |
| Ardabily et al., 2011 <sup>11</sup>             | 0.338                     | 0.291-0.386        |
| <b>Subgroup total (<math>I^2=98.5\%</math>)</b> | <b>0.134</b>              | <b>0.042-0.355</b> |
| <i>Physical violence</i>                        |                           |                    |
| Li et al., 2005 <sup>5</sup>                    | 0.051                     | 0.036-0.070        |
| Guo et al., 2006 <sup>6</sup>                   | 0.227                     | 0.190-0.266        |
| Ardabily et al., 2011 <sup>11</sup>             | 0.200                     | 0.162-0.243        |
| <b>Subgroup total (<math>I^2=97.3\%</math>)</b> | <b>0.137</b>              | <b>0.061-0.283</b> |
| <i>Sexual violence</i>                          |                           |                    |
| Li et al., 2005 <sup>5</sup>                    | 0.010                     | 0.004-0.021        |
| Guo et al., 2006 <sup>6</sup>                   | 0.027                     | 0.014-0.045        |
| Ardabily et al., 2011 <sup>11</sup>             | 0.080                     | 0.055-0.111        |
| <b>Subgroup total (<math>I^2=93.5\%</math>)</b> | <b>0.029</b>              | <b>0.009-0.092</b> |
| <i>Economic coercion</i>                        |                           |                    |
| Li et al., 2005 <sup>5</sup>                    | 0.012                     | 0.005-0.023        |
| Guo et al., 2006 <sup>6</sup>                   | 0.043                     | 0.027-0.065        |
| <b>Subgroup total (<math>I^2=90.1\%</math>)</b> | <b>0.023</b>              | <b>0.006-0.080</b> |
| <b>After 2010</b>                               |                           |                    |
| <i>Overall violence</i>                         |                           |                    |
| Iliyasu et al., 2016 <sup>14</sup>              | 0.359                     | 0.311-0.410        |
| Sahin et al., 2018 <sup>15</sup>                | 0.150                     | 0.125-0.177        |
| Silwal and Thapa, 2020 <sup>26</sup>            | 0.304                     | 0.220-0.398        |
| <b>Subgroup total (<math>I^2=96.9\%</math>)</b> | <b>0.259</b>              | <b>0.133-0.442</b> |
| <i>Psychological violence</i>                   |                           |                    |
| Farzadi et al., 2014 <sup>13</sup>              | 0.820                     | 0.760-0.871        |
| Iliyasu et al., 2016 <sup>14</sup>              | 0.338                     | 0.290-0.388        |
| Sahin et al., 2018 <sup>15</sup>                | 0.125                     | 0.103-0.151        |
| <b>Subgroup total (<math>I^2=99.3\%</math>)</b> | <b>0.408</b>              | <b>0.114-0.787</b> |
| <i>Physical violence</i>                        |                           |                    |
| Farzadi et al., 2014 <sup>13</sup>              | 0.450                     | 0.380-0.522        |
| Iliyasu et al., 2016 <sup>14</sup>              | 0.067                     | 0.044-0.097        |
| Sahin et al., 2018 <sup>15</sup>                | 0.025                     | 0.015-0.038        |
| <b>Subgroup total (<math>I^2=99.0\%</math>)</b> | <b>0.103</b>              | <b>0.013-0.501</b> |
| <i>Sexual violence</i>                          |                           |                    |
| Farzadi et al., 2014 <sup>13</sup>              | 0.540                     | 0.468-0.611        |
| Iliyasu et al., 2016 <sup>14</sup>              | 0.298                     | 0.252-0.347        |
| Sahin et al., 2018 <sup>15</sup>                | 0.049                     | 0.035-0.067        |
| <b>Subgroup total (<math>I^2=99.0\%</math>)</b> | <b>0.228</b>              | <b>0.056-0.595</b> |
| <i>Economic coercion</i>                        |                           |                    |
| Iliyasu et al., 2016 <sup>14</sup>              | 0.239                     | 0.196-0.285        |
| Sahin et al., 2018 <sup>15</sup>                | 0.000                     | 0.000-0.005        |
| <b>Subgroup total (<math>I^2=94.7\%</math>)</b> | <b>0.016</b>              | <b>0.000-0.877</b> |



**Table S7: IPV prevalence in lifetime by calendar year (before and after 2010)**

|                                                 | Statistics for each study |                    |
|-------------------------------------------------|---------------------------|--------------------|
|                                                 | Prevalence estimate       | 95% CI             |
| <b>2010 and before</b>                          |                           |                    |
| <i>Overall violence</i>                         |                           |                    |
| Leung et al., 2005 <sup>3</sup>                 | 0.018                     | 0.008-0.034        |
| Yildizhan et al., 2009 <sup>7</sup>             | 0.336                     | 0.253-0.427        |
| Omoaregba et al., 2011 <sup>9</sup>             | 0.350                     | 0.257-0.452        |
| <b>Subgroup total (<math>I^2=97.6\%</math>)</b> | <b>0.149</b>              | <b>0.030-0.497</b> |
| <i>Psychological violence</i>                   |                           |                    |
| Sami and Ali, 2006 <sup>4</sup>                 | 0.383                     | 0.335-0.432        |
| Yildizhan et al., 2009 <sup>7</sup>             | 0.295                     | 0.216-0.384        |
| Dhont et al., 2011 <sup>8</sup>                 | 0.269                     | 0.221-0.322        |
| <b>Subgroup total (<math>I^2=81.5\%</math>)</b> | <b>0.316</b>              | <b>0.244-0.399</b> |
| <i>Physical violence</i>                        |                           |                    |
| Sami and Ali, 2006 <sup>4</sup>                 | 0.090                     | 0.064-0.122        |
| Yildizhan et al., 2009 <sup>7</sup>             | 0.107                     | 0.058-0.175        |
| Dhont et al., 2011 <sup>8</sup>                 | 0.234                     | 0.188-0.285        |
| <b>Subgroup total (<math>I^2=93.1\%</math>)</b> | <b>0.135</b>              | <b>0.064-0.260</b> |
| <i>Sexual violence</i>                          |                           |                    |
| Yildizhan et al., 2009 <sup>7</sup>             | 0.025                     | 0.005-0.070        |
| Dhont et al., 2011 <sup>8</sup>                 | 0.119                     | 0.085-0.160        |
| <b>Subgroup total (<math>I^2=86.7\%</math>)</b> | <b>0.060</b>              | <b>0.012-0.246</b> |
| <i>Economic coercion</i>                        |                           |                    |
| Yildizhan et al., 2009 <sup>7</sup>             | 0.098                     | 0.057-0.165        |
| <b>After 2010</b>                               |                           |                    |
| <i>Overall violence</i>                         |                           |                    |
| Aduloju et al., 2015 <sup>12</sup>              | 0.312                     | 0.243-0.387        |
| Satheesan and Satyanarayana, 2018 <sup>16</sup> | 0.467                     | 0.283-0.657        |
| Akpinar et al., 2019 <sup>17</sup>              | 0.479                     | 0.394-0.564        |
| Rahebi et al., 2019 <sup>18</sup>               | 0.835                     | 0.776-0.884        |
| Alijani et al., 2019 <sup>19</sup>              | 0.889                     | 0.853-0.919        |
| Bondade et al., 2018 <sup>20</sup>              | 0.500                     | 0.398-0.602        |
| Sis Çelik and Kırca, 2018 <sup>21</sup>         | 0.674                     | 0.627-0.718        |
| Poornowrooz et al., 2019 <sup>23</sup>          | 0.565                     | 0.480-0.646        |
| Nabi et al., 2020 <sup>27</sup>                 | 0.510                     | 0.408-0.611        |
| <b>Subgroup total (<math>I^2=96.4\%</math>)</b> | <b>0.604</b>              | <b>0.457-0.734</b> |
| <i>Psychological violence</i>                   |                           |                    |
| Satheesan and Satyanarayana, 2018 <sup>16</sup> | 0.467                     | 0.283-0.657        |
| Akpinar et al., 2019 <sup>17</sup>              | 0.366                     | 0.287-0.451        |
| Rahebi et al., 2019 <sup>18</sup>               | 0.700                     | 0.631-0.763        |
| Alijani et al., 2019 <sup>19</sup>              | 0.858                     | 0.818-0.891        |
| Bondade et al., 2018 <sup>20</sup>              | 0.340                     | 0.248-0.442        |
| Ghoneim et al., 2021 <sup>22</sup>              | 0.412                     | 0.356-0.469        |
| Poornowrooz et al., 2019 <sup>23</sup>          | 0.524                     | 0.440-0.607        |
| Coşkuner Potur et al., 2019 <sup>24</sup>       | 0.473                     | 0.417-0.530        |
| Ghaly et al., 2019 <sup>25</sup>                | 0.963                     | 0.935-0.982        |
| Nabi et al., 2020 <sup>27</sup>                 | 0.290                     | 0.204-0.389        |
| <b>Subgroup total (<math>I^2=97.2\%</math>)</b> | <b>0.579</b>              | <b>0.423-0.721</b> |
| <i>Physical violence</i>                        |                           |                    |
| Satheesan and Satyanarayana, 2018 <sup>16</sup> | 0.167                     | 0.056-0.347        |
| Akpinar et al., 2019 <sup>17</sup>              | 0.092                     | 0.050-0.151        |
| Rahebi et al., 2019 <sup>18</sup>               | 0.680                     | 0.611-0.744        |
| Alijani et al., 2019 <sup>19</sup>              | 0.259                     | 0.215-0.306        |
| Bondade et al., 2018 <sup>20</sup>              | 0.110                     | 0.056-0.188        |
| Poornowrooz et al., 2019 <sup>23</sup>          | 0.340                     | 0.264-0.423        |
| Coşkuner Potur et al., 2019 <sup>24</sup>       | 0.076                     | 0.049-0.111        |
| Ghaly et al., 2019 <sup>25</sup>                | 0.507                     | 0.449-0.565        |
| Nabi et al., 2020 <sup>27</sup>                 | 0.160                     | 0.094-0.247        |

|                                                 |              |                    |
|-------------------------------------------------|--------------|--------------------|
| <b>Subgroup total (<math>I^2=97.1\%</math>)</b> | <b>0.230</b> | <b>0.127-0.381</b> |
| <b><i>Sexual violence</i></b>                   |              |                    |
| Satheesan and Satyanarayana, 2018 <sup>16</sup> | 0.067        | 0.008-0.221        |
| Akpınar et al., 2019 <sup>17</sup>              | 0.028        | 0.008-0.071        |
| Rahebi et al., 2019 <sup>18</sup>               | 0.600        | 0.529-0.668        |
| Alijani et al., 2019 <sup>19</sup>              | 0.288        | 0.243-0.336        |
| Bondade et al., 2018 <sup>20</sup>              | 0.050        | 0.016-0.113        |
| Poornowrooz et al., 2019 <sup>23</sup>          | 0.272        | 0.202-0.352        |
| Coşkun Potur et al., 2019 <sup>24</sup>         | 0.006        | 0.001-0.023        |
| Ghaly et al., 2019 <sup>25</sup>                | 0.457        | 0.399-0.515        |
| Nabi et al., 2020 <sup>27</sup>                 | 0.060        | 0.022-0.126        |
| <b>Subgroup total (<math>I^2=96.1\%</math>)</b> | <b>0.134</b> | <b>0.070-0.242</b> |
| <b><i>Economic coercion</i></b>                 |              |                    |
| -                                               | -            | -                  |

**Table S8: IPV prevalence in past 12 months by infertility type (“primary infertility” vs “primary or secondary infertility”)**

|                                                 | Statistics for each study |                    |
|-------------------------------------------------|---------------------------|--------------------|
|                                                 | Prevalence estimate       | 95% CI             |
| <b>Primary infertility</b>                      |                           |                    |
| <i>Overall violence</i>                         |                           |                    |
| Li et al., 2005 <sup>5</sup>                    | 0.105                     | 0.083-0.130        |
| Guo et al., 2006 <sup>6</sup>                   | 0.269                     | 0.231-0.311        |
| Ardabily et al., 2011 <sup>11</sup>             | 0.618                     | 0.568-0.665        |
| <b>Subgroup total (<math>I^2=99.3\%</math>)</b> | <b>0.292</b>              | <b>0.088-0.636</b> |
| <i>Psychological violence</i>                   |                           |                    |
| Li et al., 2005 <sup>5</sup>                    | 0.032                     | 0.020-0.048        |
| Guo et al., 2006 <sup>6</sup>                   | 0.176                     | 0.143-0.212        |
| Ardabily et al., 2011 <sup>11</sup>             | 0.338                     | 0.291-0.386        |
| <b>Subgroup total (<math>I^2=98.5\%</math>)</b> | <b>0.134</b>              | <b>0.042-0.355</b> |
| <i>Physical violence</i>                        |                           |                    |
| Li et al., 2005 <sup>5</sup>                    | 0.051                     | 0.036-0.070        |
| Guo et al., 2006 <sup>6</sup>                   | 0.227                     | 0.190-0.266        |
| Ardabily et al., 2011 <sup>11</sup>             | 0.200                     | 0.162-0.243        |
| <b>Subgroup total (<math>I^2=97.3\%</math>)</b> | <b>0.137</b>              | <b>0.061-0.283</b> |
| <i>Sexual violence</i>                          |                           |                    |
| Li et al., 2005 <sup>5</sup>                    | 0.010                     | 0.004-0.021        |
| Guo et al., 2006 <sup>6</sup>                   | 0.027                     | 0.014-0.045        |
| Ardabily et al., 2011 <sup>11</sup>             | 0.080                     | 0.055-0.111        |
| <b>Subgroup total (<math>I^2=93.5\%</math>)</b> | <b>0.029</b>              | <b>0.009-0.092</b> |
| <i>Economic coercion</i>                        |                           |                    |
| Li et al., 2005 <sup>5</sup>                    | 0.012                     | 0.005-0.023        |
| Guo et al., 2006 <sup>6</sup>                   | 0.043                     | 0.027-0.065        |
| <b>Subgroup total (<math>I^2=90.1\%</math>)</b> | <b>0.023</b>              | <b>0.006-0.080</b> |
| <b>Primary or secondary infertility</b>         |                           |                    |
| <i>Overall violence</i>                         |                           |                    |
| Edirne et al., 2010 <sup>10</sup>               | 0.878                     | 0.787-0.940        |
| Iliyasu et al., 2016 <sup>14</sup>              | 0.359                     | 0.311-0.410        |
| Sahin et al., 2018 <sup>15</sup>                | 0.150                     | 0.125-0.177        |
| Silwal and Thapa, 2020 <sup>26</sup>            | 0.304                     | 0.220-0.398        |
| <b>Subgroup total (<math>I^2=98.0\%</math>)</b> | <b>0.416</b>              | <b>0.202-0.666</b> |
| <i>Psychological violence</i>                   |                           |                    |
| Farzadi et al., 2014 <sup>13</sup>              | 0.820                     | 0.760-0.871        |
| Iliyasu et al., 2016 <sup>14</sup>              | 0.338                     | 0.290-0.388        |
| Sahin et al., 2018 <sup>15</sup>                | 0.125                     | 0.103-0.151        |
| <b>Subgroup total (<math>I^2=99.3\%</math>)</b> | <b>0.408</b>              | <b>0.114-0.787</b> |
| <i>Physical violence</i>                        |                           |                    |
| Farzadi et al., 2014 <sup>13</sup>              | 0.450                     | 0.380-0.522        |
| Iliyasu et al., 2016 <sup>14</sup>              | 0.067                     | 0.044-0.097        |
| Sahin et al., 2018 <sup>15</sup>                | 0.025                     | 0.015-0.038        |
| <b>Subgroup total (<math>I^2=99.0\%</math>)</b> | <b>0.103</b>              | <b>0.013-0.501</b> |
| <i>Sexual violence</i>                          |                           |                    |
| Farzadi et al., 2014 <sup>13</sup>              | 0.540                     | 0.468-0.611        |
| Iliyasu et al., 2016 <sup>14</sup>              | 0.298                     | 0.252-0.347        |
| Sahin et al., 2018 <sup>15</sup>                | 0.049                     | 0.035-0.067        |
| <b>Subgroup total (<math>I^2=99.0\%</math>)</b> | <b>0.228</b>              | <b>0.056-0.595</b> |
| <i>Economic coercion</i>                        |                           |                    |
| Iliyasu et al., 2016 <sup>14</sup>              | 0.239                     | 0.196-0.285        |
| Sahin et al., 2018 <sup>15</sup>                | 0.001                     | 0.000-0.005        |
| <b>Subgroup total (<math>I^2=94.7\%</math>)</b> | <b>0.016</b>              | <b>0.000-0.877</b> |

**Table S9: IPV prevalence in lifetime by infertility type (“primary infertility” vs “primary or secondary infertility”)**

|                                                 | Statistics for each study |                    |
|-------------------------------------------------|---------------------------|--------------------|
|                                                 | Prevalence estimate       | 95% CI             |
| <b>Primary infertility</b>                      |                           |                    |
| <i>Overall violence</i>                         |                           |                    |
| Yildizhan et al., 2009 <sup>7</sup>             | 0.336                     | 0.253-0.427        |
| Satheesan and Satyanarayana, 2018 <sup>16</sup> | 0.467                     | 0.283-0.657        |
| Akpinar et al., 2019 <sup>17</sup>              | 0.479                     | 0.394-0.564        |
| Rahebi et al., 2019 <sup>18</sup>               | 0.835                     | 0.776-0.884        |
| Bondade et al., 2018 <sup>20</sup>              | 0.500                     | 0.398-0.602        |
| Nabi et al., 2020 <sup>27</sup>                 | 0.510                     | 0.408-0.611        |
| <b>Subgroup total (<math>I^2=93.9\%</math>)</b> | <b>0.533</b>              | <b>0.370-0.689</b> |
| <i>Psychological violence</i>                   |                           |                    |
| Yildizhan et al., 2009 <sup>7</sup>             | 0.295                     | 0.216-0.384        |
| Satheesan and Satyanarayana, 2018 <sup>16</sup> | 0.467                     | 0.283-0.657        |
| Akpinar et al., 2019 <sup>17</sup>              | 0.366                     | 0.287-0.451        |
| Rahebi et al., 2019 <sup>18</sup>               | 0.700                     | 0.631-0.763        |
| Bondade et al., 2018 <sup>20</sup>              | 0.340                     | 0.248-0.442        |
| Ghaly et al., 2019 <sup>25</sup>                | 0.963                     | 0.935-0.982        |
| Nabi et al., 2020 <sup>27</sup>                 | 0.290                     | 0.204-0.389        |
| <b>Subgroup total (<math>I^2=97.0\%</math>)</b> | <b>0.533</b>              | <b>0.315-0.739</b> |
| <i>Physical violence</i>                        |                           |                    |
| Yildizhan et al., 2009 <sup>7</sup>             | 0.107                     | 0.058-0.175        |
| Satheesan and Satyanarayana, 2018 <sup>16</sup> | 0.167                     | 0.056-0.347        |
| Akpinar et al., 2019 <sup>17</sup>              | 0.092                     | 0.050-0.151        |
| Rahebi et al., 2019 <sup>18</sup>               | 0.680                     | 0.611-0.744        |
| Bondade et al., 2018 <sup>20</sup>              | 0.110                     | 0.056-0.188        |
| Ghaly et al., 2019 <sup>25</sup>                | 0.507                     | 0.449-0.565        |
| Nabi et al., 2020 <sup>27</sup>                 | 0.160                     | 0.094-0.247        |
| <b>Subgroup total (<math>I^2=97.1\%</math>)</b> | <b>0.221</b>              | <b>0.097-0.428</b> |
| <i>Sexual violence</i>                          |                           |                    |
| Yildizhan et al., 2009 <sup>7</sup>             | 0.025                     | 0.005-0.070        |
| Satheesan and Satyanarayana, 2018 <sup>16</sup> | 0.067                     | 0.008-0.221        |
| Akpinar et al., 2019 <sup>17</sup>              | 0.028                     | 0.008-0.071        |
| Rahebi et al., 2019 <sup>18</sup>               | 0.600                     | 0.529-0.668        |
| Bondade et al., 2018 <sup>20</sup>              | 0.050                     | 0.016-0.113        |
| Ghaly et al., 2019 <sup>25</sup>                | 0.457                     | 0.399-0.515        |
| Nabi et al., 2020 <sup>27</sup>                 | 0.060                     | 0.022-0.126        |
| <b>Subgroup total (<math>I^2=96.6\%</math>)</b> | <b>0.109</b>              | <b>0.039-0.268</b> |
| <i>Economic coercion</i>                        |                           |                    |
| Yildizhan et al., 2009 <sup>7</sup>             | 0.098                     | 0.057-0.165        |
| <b>Primary or secondary infertility</b>         |                           |                    |
| <i>Overall violence</i>                         |                           |                    |
| Leung et al., 2005 <sup>3</sup>                 | 0.018                     | 0.008-0.034        |
| Omoaregba et al., 2011 <sup>9</sup>             | 0.350                     | 0.257-0.452        |
| Aduloju et al., 2015 <sup>12</sup>              | 0.312                     | 0.243-0.387        |
| Alijani et al., 2019 <sup>19</sup>              | 0.889                     | 0.853-0.919        |
| Sis Çelik and Kırca, 2018 <sup>21</sup>         | 0.674                     | 0.627-0.718        |
| Poornowrooz et al., 2019 <sup>23</sup>          | 0.565                     | 0.480-0.646        |
| <b>Subgroup total (<math>I^2=98.6\%</math>)</b> | <b>0.410</b>              | <b>0.181-0.686</b> |
| <i>Psychological violence</i>                   |                           |                    |
| Dhont et al., 2011 <sup>8</sup>                 | 0.269                     | 0.221-0.322        |
| Alijani et al., 2019 <sup>19</sup>              | 0.858                     | 0.818-0.891        |
| Ghoneim et al., 2021 <sup>22</sup>              | 0.412                     | 0.356-0.469        |
| Poornowrooz et al., 2019 <sup>23</sup>          | 0.524                     | 0.440-0.607        |
| Coşkuner Potur et al., 2019 <sup>24</sup>       | 0.473                     | 0.417-0.530        |

|                                                 |              |                    |
|-------------------------------------------------|--------------|--------------------|
| <b>Subgroup total (<math>I^2=98.2\%</math>)</b> | <b>0.521</b> | <b>0.316-0.718</b> |
| <b><i>Physical violence</i></b>                 |              |                    |
| Dhont et al., 2011 <sup>8</sup>                 | 0.234        | 0.188-0.285        |
| Alijani et al., 2019 <sup>19</sup>              | 0.259        | 0.215-0.306        |
| Poornowrooz et al., 2019 <sup>23</sup>          | 0.340        | 0.264-0.423        |
| Coşkuner Potur et al., 2019 <sup>24</sup>       | 0.076        | 0.049-0.111        |
| <b>Subgroup total (<math>I^2=93.8\%</math>)</b> | <b>0.208</b> | <b>0.126-0.325</b> |
| <b><i>Sexual violence</i></b>                   |              |                    |
| Dhont et al., 2011 <sup>8</sup>                 | 0.119        | 0.085-0.160        |
| Alijani et al., 2019 <sup>19</sup>              | 0.288        | 0.243-0.336        |
| Poornowrooz et al., 2019 <sup>23</sup>          | 0.272        | 0.202-0.352        |
| Coşkuner Potur et al., 2019 <sup>24</sup>       | 0.006        | 0.001-0.023        |
| <b>Subgroup total (<math>I^2=94.9\%</math>)</b> | <b>0.129</b> | <b>0.059-0.258</b> |
| <b><i>Economic coercion</i></b>                 |              |                    |
| -                                               | -            | -                  |

**Table S10: IPV prevalence (95% CI) in past 12 months and lifetime by region (“Africa” vs “West Asia” vs “South Asia” vs “East Asia”)**

|                                           | Overall violence                                              | Psychological violence                                        | Physical violence                                             | Sexual violence                                               | Economic coercion                                             |
|-------------------------------------------|---------------------------------------------------------------|---------------------------------------------------------------|---------------------------------------------------------------|---------------------------------------------------------------|---------------------------------------------------------------|
| <b>Past 12 months</b>                     |                                                               |                                                               |                                                               |                                                               |                                                               |
| <i>Africa</i>                             |                                                               |                                                               |                                                               |                                                               |                                                               |
| Iliyasu et al., 2016 <sup>14</sup>        | 0.359 (0.312-0.409)                                           | 0.338 (0.292-0.387)                                           | 0.067 (0.046-0.097)                                           | 0.298 (0.253-0.346)                                           | 0.239 (0.198-0.285)                                           |
| <i>West Asia</i>                          |                                                               |                                                               |                                                               |                                                               |                                                               |
| Edirne et al., 2010 <sup>10</sup>         | 0.878 (0.787-0.940)                                           | -                                                             | -                                                             | -                                                             | -                                                             |
| Ardabilly et al., 2011 <sup>11</sup>      | 0.618 (0.568-0.665)                                           | 0.338 (0.291-0.386)                                           | 0.200 (0.162-0.243)                                           | 0.080 (0.055-0.111)                                           | -                                                             |
| Farzadi et al., 2014 <sup>13</sup>        | -                                                             | 0.820 (0.760-0.871)                                           | 0.450 (0.380-0.522)                                           | 0.540 (0.468-0.611)                                           | -                                                             |
| Sahin et al., 2018 <sup>15</sup>          | 0.150 (0.125-0.177)                                           | 0.125 (0.103-0.151)                                           | 0.025 (0.015-0.038)                                           | 0.049 (0.035-0.067)                                           | 0.001 (0.000-0.010)                                           |
| <b>Subgroup total</b>                     | <b>0.554 (0.161-0.889)</b><br>( <i>I</i> <sup>2</sup> =99.3%) | <b>0.408 (0.116-0.784)</b><br>( <i>I</i> <sup>2</sup> =99.3%) | <b>0.149 (0.033-0.471)</b><br>( <i>I</i> <sup>2</sup> =98.8%) | <b>0.148 (0.022-0.570)</b><br>( <i>I</i> <sup>2</sup> =99.2%) | -                                                             |
| <i>South Asia</i>                         |                                                               |                                                               |                                                               |                                                               |                                                               |
| Silwal and Thapa, 2020 <sup>26</sup>      | 0.304 (0.226-0.395)                                           | -                                                             | -                                                             | -                                                             | -                                                             |
| <i>East Asia</i>                          |                                                               |                                                               |                                                               |                                                               |                                                               |
| Li et al., 2005 <sup>5</sup>              | 0.105 (0.083-0.130)                                           | 0.032 (0.020-0.048)                                           | 0.051 (0.036-0.070)                                           | 0.010 (0.004-0.021)                                           | 0.012 (0.005-0.023)                                           |
| Guo et al., 2006 <sup>6</sup>             | 0.269 (0.231-0.311)                                           | 0.176 (0.143-0.212)                                           | 0.227 (0.190-0.266)                                           | 0.027 (0.014-0.045)                                           | 0.043 (0.027-0.065)                                           |
| <b>Subgroup total</b>                     | <b>0.172 (0.063-0.391)</b><br>( <i>I</i> <sup>2</sup> =98.0%) | <b>0.078 (0.013-0.344)</b><br>( <i>I</i> <sup>2</sup> =98.2%) | <b>0.112 (0.023-0.399)</b><br>( <i>I</i> <sup>2</sup> =98.5%) | <b>0.017 (0.007-0.043)</b><br>( <i>I</i> <sup>2</sup> =76.4%) | <b>0.023 (0.006-0.080)</b><br>( <i>I</i> <sup>2</sup> =90.1%) |
| <b>Lifetime</b>                           |                                                               |                                                               |                                                               |                                                               |                                                               |
| <i>Africa</i>                             |                                                               |                                                               |                                                               |                                                               |                                                               |
| Dhont et al., 2011 <sup>8</sup>           | -                                                             | 0.269 (0.221-0.322)                                           | 0.234 (0.188-0.285)                                           | 0.119 (0.085-0.160)                                           | -                                                             |
| Omoaregba et al., 2011 <sup>9</sup>       | 0.350 (0.257-0.452)                                           | -                                                             | -                                                             | -                                                             | -                                                             |
| Aduloju et al., 2015 <sup>12</sup>        | 0.312 (0.243-0.387)                                           | -                                                             | -                                                             | -                                                             | -                                                             |
| Ghoneim et al., 2021 <sup>22</sup>        | -                                                             | 0.412 (0.356-0.469)                                           | -                                                             | -                                                             | -                                                             |
| Ghaly et al., 2019 <sup>25</sup>          | -                                                             | 0.963 (0.935-0.982)                                           | 0.507 (0.449-0.565)                                           | 0.457 (0.399-0.515)                                           | -                                                             |
| <b>Subgroup total</b>                     | <b>0.326 (0.273-0.384)</b><br>( <i>I</i> <sup>2</sup> =0.0%)  | <b>0.647 (0.268-0.902)</b><br>( <i>I</i> <sup>2</sup> =98.8%) | <b>0.359 (0.146-0.648)</b><br>( <i>I</i> <sup>2</sup> =97.9%) | <b>0.253 (0.053-0.670)</b><br>( <i>I</i> <sup>2</sup> =98.7%) | -                                                             |
| <i>West Asia</i>                          |                                                               |                                                               |                                                               |                                                               |                                                               |
| Yildizhan et al., 2009 <sup>7</sup>       | 0.336 (0.253-0.427)                                           | 0.295 (0.216-0.384)                                           | 0.107 (0.058-0.175)                                           | 0.025 (0.005-0.070)                                           | 0.098 (0.057-0.165)                                           |
| Akpınar et al., 2019 <sup>17</sup>        | 0.479 (0.394-0.564)                                           | 0.366 (0.287-0.451)                                           | 0.092 (0.050-0.151)                                           | 0.028 (0.008-0.071)                                           | -                                                             |
| Rahebi et al., 2019 <sup>18</sup>         | 0.835 (0.776-0.884)                                           | 0.700 (0.631-0.763)                                           | 0.680 (0.611-0.744)                                           | 0.600 (0.529-0.668)                                           | -                                                             |
| Alijani et al., 2019 <sup>19</sup>        | 0.889 (0.853-0.919)                                           | 0.858 (0.818-0.891)                                           | 0.259 (0.215-0.306)                                           | 0.288 (0.243-0.336)                                           | -                                                             |
| Sis Çelik and Kirca, 2018 <sup>21</sup>   | 0.674 (0.627-0.718)                                           | -                                                             | -                                                             | -                                                             | -                                                             |
| Poornowrooz et al., 2019 <sup>23</sup>    | 0.565 (0.480-0.646)                                           | 0.524 (0.440-0.607)                                           | 0.340 (0.264-0.423)                                           | 0.272 (0.202-0.352)                                           | -                                                             |
| Coşkuner Potur et al., 2019 <sup>24</sup> | -                                                             | 0.473 (0.417-0.530)                                           | 0.076 (0.049-0.111)                                           | 0.006 (0.001-0.023)                                           | -                                                             |
| <b>Subgroup total</b>                     | <b>0.658 (0.477-0.803)</b>                                    | <b>0.551 (0.366-0.724)</b>                                    | <b>0.214 (0.093-0.420)</b>                                    | <b>0.110 (0.043-0.255)</b>                                    | -                                                             |

|                                                 | $(I^2=97.2\%)$                              | $(I^2=97.4\%)$                               | $(I^2=97.7\%)$                               | $(I^2=96.9\%)$                              |   |
|-------------------------------------------------|---------------------------------------------|----------------------------------------------|----------------------------------------------|---------------------------------------------|---|
| <b>South Asia</b>                               |                                             |                                              |                                              |                                             |   |
| Sami and Ali, 2006 <sup>4</sup>                 | -                                           | 0.382 (0.335-0.432)                          | 0.090 (0.064-0.122)                          | -                                           | - |
| Satheesan and Satyanarayana, 2018 <sup>16</sup> | 0.467 (0.283-0.657)                         | 0.467 (0.283-0.657)                          | 0.167 (0.056-0.347)                          | 0.067 (0.008-0.221)                         | - |
| Bondade et al., 2018 <sup>20</sup>              | 0.500 (0.398-0.602)                         | 0.340 (0.248-0.442)                          | 0.110 (0.056-0.188)                          | 0.050 (0.016-0.113)                         | - |
| Nabi et al., 2020 <sup>27</sup>                 | 0.510 (0.408-0.611)                         | 0.290 (0.204-0.389)                          | 0.160 (0.094-0.247)                          | 0.060 (0.022-0.126)                         | - |
| <b>Subgroup total</b>                           | <b>0.500 (0.436-0.564)</b><br>$(I^2=0.0\%)$ | <b>0.360 (0.308-0.416)</b><br>$(I^2=33.6\%)$ | <b>0.118 (0.085-0.162)</b><br>$(I^2=41.2\%)$ | <b>0.057 (0.033-0.095)</b><br>$(I^2=0.0\%)$ | - |
| <b>East Asia</b>                                |                                             |                                              |                                              |                                             |   |
| Leung et al., 2005 <sup>3</sup>                 | 0.018 (0.009-0.034)                         | -                                            | -                                            | -                                           | - |

**Table S11: IPV prevalence (95% CI) in past 12 months and lifetime by risk of bias (“High” vs “Moderate” vs “Low”)**

|                                                 | Overall violence                                           | Psychological violence                                     | Physical violence                                          | Sexual violence                                            | Economic coercion                                          |
|-------------------------------------------------|------------------------------------------------------------|------------------------------------------------------------|------------------------------------------------------------|------------------------------------------------------------|------------------------------------------------------------|
| <b>Past 12 months</b>                           |                                                            |                                                            |                                                            |                                                            |                                                            |
| <i>High</i>                                     |                                                            |                                                            |                                                            |                                                            |                                                            |
| Edirne et al., 2010 <sup>10</sup>               | 0.878 (0.787-0.940)                                        | -                                                          | -                                                          | -                                                          | -                                                          |
| Ardabilly et al., 2011 <sup>11</sup>            | 0.618 (0.568-0.665)                                        | 0.338 (0.291-0.386)                                        | 0.200 (0.162-0.243)                                        | 0.080 (0.055-0.111)                                        | -                                                          |
| Farzadi et al., 2014 <sup>13</sup>              | -                                                          | 0.820 (0.760-0.871)                                        | 0.450 (0.380-0.522)                                        | 0.540 (0.468-0.611)                                        | -                                                          |
| Silwal and Thapa, 2020 <sup>26</sup>            | 0.304 (0.220-0.398)                                        | -                                                          | -                                                          | -                                                          | -                                                          |
| <b>Subgroup total</b>                           | <b>0.625 (0.333-0.848)</b><br><i>(I<sup>2</sup>=96.5%)</i> | <b>0.602 (0.150-0.928)</b><br><i>(I<sup>2</sup>=99.1%)</i> | <b>0.311 (0.124-0.591)</b><br><i>(I<sup>2</sup>=97.5%)</i> | <b>0.243 (0.024-0.804)</b><br><i>(I<sup>2</sup>=99.2%)</i> | -                                                          |
| <i>Moderate</i>                                 |                                                            |                                                            |                                                            |                                                            |                                                            |
| Sahin et al., 2018 <sup>15</sup>                | 0.150 (0.126-0.177)                                        | 0.125 (0.104-0.151)                                        | 0.025 (0.016-0.038)                                        | 0.049 (0.036-0.067)                                        | 0.001 (0.000-0.010)                                        |
| <i>Low</i>                                      |                                                            |                                                            |                                                            |                                                            |                                                            |
| Li et al., 2005 <sup>5</sup>                    | 0.105 (0.083-0.130)                                        | 0.032 (0.020-0.048)                                        | 0.051 (0.036-0.070)                                        | 0.010 (0.004-0.021)                                        | 0.012 (0.006-0.023)                                        |
| Guo et al., 2006 <sup>6</sup>                   | 0.269 (0.231-0.311)                                        | 0.176 (0.143-0.212)                                        | 0.227 (0.190-0.266)                                        | 0.027 (0.014-0.045)                                        | 0.043 (0.028-0.065)                                        |
| Iliyasu et al., 2016 <sup>14</sup>              | 0.359 (0.311-0.410)                                        | 0.338 (0.290-0.388)                                        | 0.067 (0.044-0.097)                                        | 0.298 (0.252-0.347)                                        | 0.239 (0.198-0.285)                                        |
| <b>Subgroup total</b>                           | <b>0.225 (0.109-0.407)</b><br><i>(I<sup>2</sup>=97.9%)</i> | <b>0.134 (0.042-0.356)</b><br><i>(I<sup>2</sup>=98.5%)</i> | <b>0.095 (0.031-0.255)</b><br><i>(I<sup>2</sup>=97.7%)</i> | <b>0.048 (0.004-0.365)</b><br><i>(I<sup>2</sup>=98.7%)</i> | <b>0.023 (0.006-0.080)</b><br><i>(I<sup>2</sup>=90.1%)</i> |
| <b>Lifetime</b>                                 |                                                            |                                                            |                                                            |                                                            |                                                            |
| <i>High</i>                                     |                                                            |                                                            |                                                            |                                                            |                                                            |
| Leung et al., 2005 <sup>3</sup>                 | 0.018 (0.008-0.034)                                        | -                                                          | -                                                          | -                                                          | -                                                          |
| Sami and Ali, 2006 <sup>4</sup>                 | -                                                          | 0.382 (0.335-0.432)                                        | 0.090 (0.064-0.122)                                        | -                                                          | -                                                          |
| Yildizhan et al., 2009 <sup>7</sup>             | 0.336 (0.253-0.427)                                        | 0.295 (0.216-0.384)                                        | 0.107 (0.058-0.175)                                        | 0.025 (0.005-0.070)                                        | 0.098 (0.057-0.165)                                        |
| Omoaregba et al., 2011 <sup>9</sup>             | 0.350 (0.257-0.452)                                        | -                                                          | -                                                          | -                                                          | -                                                          |
| Aduloju et al., 2015 <sup>12</sup>              | 0.312 (0.243-0.387)                                        | -                                                          | -                                                          | -                                                          | -                                                          |
| Akpinar et al., 2019 <sup>17</sup>              | 0.479 (0.394-0.564)                                        | 0.366 (0.287-0.451)                                        | 0.092 (0.050-0.151)                                        | 0.028 (0.008-0.071)                                        | -                                                          |
| Alijani et al., 2019 <sup>19</sup>              | 0.889 (0.853-0.919)                                        | 0.858 (0.818-0.891)                                        | 0.259 (0.215-0.306)                                        | 0.288 (0.243-0.336)                                        | -                                                          |
| Poornowrooz et al., 2019 <sup>23</sup>          | 0.565 (0.480-0.646)                                        | 0.524 (0.440-0.607)                                        | 0.340 (0.264-0.423)                                        | 0.272 (0.202-0.352)                                        | -                                                          |
| Ghaly et al., 2019 <sup>25</sup>                | -                                                          | 0.963 (0.935-0.982)                                        | 0.507 (0.449-0.565)                                        | 0.457 (0.399-0.515)                                        | -                                                          |
| <b>Subgroup total</b>                           | <b>0.371 (0.170-0.630)</b><br><i>(I<sup>2</sup>=98.3%)</i> | <b>0.629 (0.378-0.825)</b><br><i>(I<sup>2</sup>=98.4%)</i> | <b>0.200 (0.102-0.356)</b><br><i>(I<sup>2</sup>=97.1%)</i> | <b>0.165 (0.084-0.298)</b><br><i>(I<sup>2</sup>=95.2%)</i> | -                                                          |
| <i>Moderate</i>                                 |                                                            |                                                            |                                                            |                                                            |                                                            |
| Satheesan and Satyanarayana, 2018 <sup>16</sup> | 0.467 (0.283-0.657)                                        | 0.467 (0.283-0.657)                                        | 0.167 (0.056-0.347)                                        | 0.067 (0.008-0.221)                                        | -                                                          |
| Rahebi et al., 2019 <sup>18</sup>               | 0.835 (0.776-0.884)                                        | 0.700 (0.631-0.763)                                        | 0.680 (0.611-0.744)                                        | 0.600 (0.529-0.668)                                        | -                                                          |
| Bondade et al., 2018 <sup>20</sup>              | 0.500 (0.398-0.602)                                        | 0.340 (0.248-0.442)                                        | 0.110 (0.056-0.188)                                        | 0.050 (0.016-0.113)                                        | -                                                          |
| Ghoneim et al., 2021 <sup>22</sup>              | -                                                          | 0.412 (0.356-0.469)                                        | -                                                          | -                                                          | -                                                          |



|                                           |                                                            |                                                            |                                                            |                                                            |   |
|-------------------------------------------|------------------------------------------------------------|------------------------------------------------------------|------------------------------------------------------------|------------------------------------------------------------|---|
| Coşkuner Potur et al., 2019 <sup>24</sup> | -                                                          | 0.473 (0.417-0.530)                                        | 0.076 (0.049-0.111)                                        | 0.006 (0.001-0.023)                                        | - |
| Nabi et al., 2020 <sup>27</sup>           | 0.510 (0.408-0.611)                                        | 0.290 (0.204-0.389)                                        | 0.160 (0.094-0.247)                                        | 0.060 (0.022-0.126)                                        | - |
| <b>Subgroup total</b>                     | <b>0.598 (0.380-0.783)</b><br><i>(I<sup>2</sup>=93.9%)</i> | <b>0.448 (0.336-0.566)</b><br><i>(I<sup>2</sup>=92.0%)</i> | <b>0.196 (0.049-0.533)</b><br><i>(I<sup>2</sup>=98.0%)</i> | <b>0.072 (0.009-0.405)</b><br><i>(I<sup>2</sup>=97.3%)</i> | - |
| <b>Low</b>                                |                                                            |                                                            |                                                            |                                                            |   |
| Dhont et al., 2011 <sup>8</sup>           | -                                                          | 0.269 (0.223-0.321)                                        | 0.234 (0.190-0.284)                                        | 0.119 (0.087-0.159)                                        | - |
| Sis Çelik and Kırca, 2018 <sup>21</sup>   | 0.674 (0.628-0.717)                                        | -                                                          | -                                                          | -                                                          | - |

**Table S12: Subgroup analyses and meta-regression analyses for the pooled prevalence of IPV in the past 12 months**

|                         | Studies | Sample size | Prevalence (95% CI) (%) | $I^2$ (%) | Meta-regression |                      |            |           |
|-------------------------|---------|-------------|-------------------------|-----------|-----------------|----------------------|------------|-----------|
|                         |         |             |                         |           | $\beta$ (SE)    | OR (95% CI)          | $p$ -value | $R^2$ (%) |
| <b>Past 12 months</b>   |         |             |                         |           |                 |                      |            |           |
| <b>Overall</b>          |         |             |                         |           |                 |                      |            |           |
| <i>Year</i>             |         |             |                         |           |                 |                      |            |           |
| 2010 and before         | 4       | 1659        | 45.0 (17.5-76.0)        | 99.1      | ref             | ref                  | ref        | 0.00      |
| After 2010              | 3       | 1259        | 25.9 (13.3-44.2)        | 96.9      | -0.195 (0.212)  | 0.823 (0.543, 1.247) | 0.357      |           |
| <i>Infertility Type</i> |         |             |                         |           |                 |                      |            |           |
| Primary                 | 3       | 1577        | 29.2 (8.8-63.6)         | 99.3      | ref             | ref                  | ref        | 0.00      |
| Primary or secondary    | 4       | 1341        | 41.6 (20.2-66.6)        | 98.0      | 0.092 (0.226)   | 1.096 (0.705, 1.704) | 0.684      |           |
| <i>Region</i>           |         |             |                         |           |                 |                      |            |           |
| Africa                  | 1       | 373         | 35.9 (31.2-40.9)        | -         | ref             | ref                  | ref        |           |
| West Asia               | 3       | 1256        | 55.4 (16.1-88.9)        | 99.3      | 0.188 (0.356)   | 1.207 (0.601, 2.425) | 0.598      | 0.00      |
| South Asia              | 1       | 112         | 30.4 (22.6-39.5)        | -         | -0.056 (0.438)  | 0.946 (0.401, 2.231) | 0.899      |           |
| East Asia               | 2       | 1177        | 17.2 (6.3-39.1)         | 98.0      | -0.172 (0.378)  | 0.842 (0.401, 1.766) | 0.648      |           |
| <i>Risk of bias</i>     |         |             |                         |           |                 |                      |            |           |
| High                    | 3       | 594         | 62.5 (33.3-84.8)        | 96.5      | ref             | ref                  | ref        |           |
| Moderate                | 1       | 774         | 15.0 (12.6-17.7)        | -         | -0.451 (0.253)  | 0.637 (0.388, 1.046) | 0.075      | 35.74     |
| Low                     | 3       | 1550        | 22.5 (10.9-40.7)        | 97.9      | -0.357 (0.180)  | 0.670 (0.492, 0.996) | 0.047      |           |
| <i>Sample size</i>      | 7       | 2918        | -                       | -         | -0.001 (0.000)  | 0.999 (0.999, 1.000) | 0.018      | 44.17     |
| <b>Psychological</b>    |         |             |                         |           |                 |                      |            |           |
| <i>Year</i>             |         |             |                         |           |                 |                      |            |           |
| 2010 and before         | 3       | 1577        | 13.4 (4.2-35.5)         | 98.5      | ref             | ref                  | ref        | 3.94      |
| After 2010              | 3       | 1347        | 40.8 (11.4-78.7)        | 99.3      | 0.246 (0.223)   | 1.279 (0.826-1.980)  | 0.272      |           |
| <i>Infertility Type</i> |         |             |                         |           |                 |                      |            |           |
| Primary                 | 3       | 1577        | 13.4 (4.2-35.5)         | 98.5      | ref             | ref                  | ref        | 3.94      |
| Primary or secondary    | 3       | 1347        | 40.8 (11.4-78.7)        | 99.3      | 0.246 (0.223)   | 1.279 (0.826-1.980)  | 0.272      |           |
| <i>Region</i>           |         |             |                         |           |                 |                      |            |           |
| Africa                  | 1       | 373         | 33.8 (29.2-38.7)        | -         | ref             | ref                  | ref        | 0.00      |
| West Asia               | 3       | 1374        | 40.8 (11.6-78.4)        | 99.3      | 0.089 (0.342)   | 1.093 (0.559-2.137)  | 0.795      |           |
| South Asia              | 0       | 0           | -                       | -         | -               | -                    | -          |           |
| East Asia               | 2       | 1177        | 7.8 (1.3-34.4)          | 98.2      | -0.234 (0.363)  | 0.791 (0.388-1.612)  | 0.519      |           |
| <i>Risk of bias</i>     |         |             |                         |           |                 |                      |            |           |
| High                    | 2       | 600         | 60.2 (15.0-92.8)        | 99.1      | ref             | ref                  | ref        | 30.70     |
| Moderate                | 1       | 774         | 12.5 (10.4-15.1)        | -         | -0.453 (0.285)  | 0.636 (0.364-1.111)  | 0.112      |           |

|                         |   |      |                  |      |                |                      |         |       |
|-------------------------|---|------|------------------|------|----------------|----------------------|---------|-------|
| Low                     | 3 | 1550 | 13.4 (4.2-35.6)  | 98.5 | -0.397 (0.213) | 0.672 (0.443, 1.021) | 0.062   |       |
| <b>Sample size</b>      | 6 | 2924 | -                | -    | -0.001 (0.000) | 0.999 (0.998, 0.999) | < 0.001 | 72.05 |
| <b>Physical</b>         |   |      |                  |      |                |                      |         |       |
| <b>Year</b>             |   |      |                  |      |                |                      |         |       |
| 2010 and before         | 3 | 1577 | 13.7 (6.1-28.3)  | 97.3 | ref            | ref                  | ref     | 0.00  |
| After 2010              | 3 | 1347 | 10.3 (1.3-50.1)  | 99.0 | 0.018 (0.144)  | 1.018 (0.768, 1.350) | 0.898   |       |
| <b>Infertility Type</b> |   |      |                  |      |                |                      |         |       |
| Primary                 | 3 | 1577 | 13.7 (6.1-28.3)  | 97.3 | ref            | ref                  | ref     | 0.00  |
| Primary or secondary    | 3 | 1347 | 10.3 (1.3-50.1)  | 99.0 | 0.018 (0.144)  | 1.018 (0.768, 1.350) | 0.898   |       |
| <b>Region</b>           |   |      |                  |      |                |                      |         |       |
| Africa                  | 1 | 373  | 6.7 (4.6-9.7)    | -    | ref            | ref                  | ref     | 0.00  |
| West Asia               | 3 | 1374 | 14.9 (3.3-47.1)  | 98.8 | 0.155 (0.216)  | 1.168 (0.765-1.783)  | 0.472   |       |
| South Asia              | 0 | 0    | -                | -    | -              | -                    | -       |       |
| East Asia               | 2 | 1177 | 11.2 (2.3-39.9)  | 98.5 | 0.071 (0.229)  | 1.074 (0.685-1.682)  | 0.755   |       |
| <b>Risk of bias</b>     |   |      |                  |      |                |                      |         |       |
| High                    | 2 | 600  | 31.1 (12.4-59.1) | 97.5 | ref            | ref                  | ref     | 35.12 |
| Moderate                | 1 | 774  | 2.5 (1.6-3.8)    | -    | -0.297 (0.156) | 0.743 (0.547-1.009)  | 0.056   |       |
| Low                     | 3 | 1550 | 9.5 (3.1-25.5)   | 97.7 | -0.208 (0.117) | 0.812 (0.646-1.022)  | 0.076   |       |
| <b>Sample size</b>      | 6 | 2924 | -                | -    | -0.001 (0.000) | 0.999 (0.999, 1.000) | 0.008   | 55.63 |
| <b>Sexual</b>           |   |      |                  |      |                |                      |         |       |
| <b>Year</b>             |   |      |                  |      |                |                      |         |       |
| 2010 and before         | 3 | 1577 | 2.9 (0.9-9.2)    | 93.5 | ref            | ref                  | ref     |       |
| After 2010              | 3 | 1347 | 22.8 (5.6-59.5)  | 99.0 | 0.254 (0.142)  | 1.289 (0.976-1.703)  | 0.074   | 30.63 |
| <b>Infertility Type</b> |   |      |                  |      |                |                      |         |       |
| Primary                 | 3 | 1577 | 2.9 (0.9-9.2)    | 93.5 | ref            | ref                  | ref     |       |
| Primary or secondary    | 3 | 1347 | 22.8 (5.6-59.5)  | 99.0 | 0.254 (0.142)  | 1.289 (0.976-1.703)  | 0.074   | 30.63 |
| <b>Region</b>           |   |      |                  |      |                |                      |         |       |
| Africa                  | 1 | 373  | 29.8 (25.3-34.6) | -    | ref            | ref                  | ref     | 0.00  |
| West Asia               | 3 | 1374 | 14.8 (2.2-57.0)  | 99.2 | -0.077 (0.257) | 0.926 (0.559-1.532)  | 0.765   |       |
| South Asia              | 0 | 0    | -                | -    | -              | -                    | -       |       |
| East Asia               | 2 | 1177 | 1.7 (0.7-4.3)    | 76.4 | -0.279 (0.272) | 0.767 (0.444-1.289)  | 0.305   |       |
| <b>Risk of bias</b>     |   |      |                  |      |                |                      |         |       |
| High                    | 2 | 600  | 24.3 (2.4-80.4)  | 99.2 | ref            | ref                  | ref     | 0.00  |
| Moderate                | 1 | 774  | 4.9 (3.6-6.7)    | -    | -0.259 (0.280) | 0.772 (0.446-1.336)  | 0.355   |       |
| Low                     | 3 | 1550 | 4.8 (0.4-36.5)   | 98.7 | -0.197 (0.209) | 0.821 (0.545-1.237)  | 0.346   |       |
| <b>Sample size</b>      | 6 | 2924 | -                | -    | -0.001 (0.000) | 0.999 (0.999-1.000)  | 0.007   | 55.83 |

Random-effects meta-regression model with restricted maximum likelihood (REML) method was used to conduct meta-regression.

**Table S13: Subgroup analyses and meta-regression analyses for the pooled prevalence of IPV in lifetime**

|                         | Studies | Sample size | Prevalence (95% CI) (%) | $I^2$ (%) | Meta-regression |                      |            |           |
|-------------------------|---------|-------------|-------------------------|-----------|-----------------|----------------------|------------|-----------|
|                         |         |             |                         |           | $\beta$ (SE)    | OR (95% CI)          | $p$ -value | $R^2$ (%) |
| <b>Lifetime</b>         |         |             |                         |           |                 |                      |            |           |
| <b>Overall</b>          |         |             |                         |           |                 |                      |            |           |
| <i>Year</i>             |         |             |                         |           |                 |                      |            |           |
| 2010 and before         | 3       | 722         | 14.9 (3.0-49.7)         | 97.6      | ref             | ref                  | ref        | 39.46     |
| After 2010              | 9       | 1691        | 60.4 (45.7-73.4)        | 96.4      | 0.355 (0.127)   | 1.426 (1.112-1.829)  | 0.005      |           |
| <i>Infertility Type</i> |         |             |                         |           |                 |                      |            |           |
| Primary                 | 6       | 694         | 53.3 (37.0-68.9)        | 93.0      | ref             | ref                  | ref        | 0.00      |
| Primary or secondary    | 6       | 1719        | 41.0 (18.1-68.6)        | 98.6      | -0.055 (0.146)  | 0.946 (0.711, 1.260) | 0.706      |           |
| <i>Region</i>           |         |             |                         |           |                 |                      |            |           |
| Africa                  | 2       | 270         | 32.6 (27.3-38.4)        | 0.0       | ref             | ref                  | ref        | 50.95     |
| West Asia               | 6       | 1413        | 65.8 (47.7-80.3)        | 97.2      | 0.303 (0.140)   | 1.354 (1.029-1.781)  | 0.031      |           |
| South Asia              | 3       | 230         | 50.0 (43.6-56.4)        | 0.0       | 0.163 (0.160)   | 1.177 (0.860-1.611)  | 0.308      |           |
| East Asia               | 1       | 500         | 1.8 (0.9-3.4)           | -         | -0.313 (0.207)  | 0.731 (0.487-1.097)  | 0.131      |           |
| <i>Risk of bias</i>     |         |             |                         |           |                 |                      |            |           |
| High                    | 7       | 1560        | 37.1 (17.0-63.0)        | 98.3      | ref             | ref                  | ref        | 0.00      |
| Moderate                | 4       | 430         | 59.8 (38.0-78.3)        | 93.3      | 0.161 (0.155)   | 1.175 (0.867-1.592)  | 0.298      |           |
| Low                     | 1       | 423         | 67.4 (62.8-71.7)        | -         | 0.253 (0.260)   | 1.288 (0.774-2.144)  | 0.331      |           |
| <i>Sample size</i>      | 12      | 2413        | -                       | -         | -0.000 (0.001)  | 1.000 (0.998-1.002)  | 0.986      | 0.00      |
| <b>Psychological</b>    |         |             |                         |           |                 |                      |            |           |
| <i>Year</i>             |         |             |                         |           |                 |                      |            |           |
| 2010 and before         | 3       | 834         | 31.6 (24.4-39.9)        | 81.5      | ref             | ref                  | ref        | 13.04     |
| After 2010              | 10      | 2019        | 57.9 (42.3-72.1)        | 97.2      | 0.227 (0.138)   | 1.255 (0.957-1.645)  | 0.100      |           |
| <i>Infertility Type</i> |         |             |                         |           |                 |                      |            |           |
| Primary                 | 7       | 994         | 53.3 (31.5-73.9)        | 97.0      | ref             | ref                  | ref        | 0.00      |
| Primary or secondary    | 5       | 1459        | 52.1 (31.6-71.8)        | 98.2      | 0.016 (0.143)   | 1.016 (0.768-1.345)  | 0.912      |           |
| <i>Region</i>           |         |             |                         |           |                 |                      |            |           |
| Africa                  | 3       | 918         | 64.7 (26.8-90.2)        | 98.8      | ref             | ref                  | ref        | 0.00      |
| West Asia               | 6       | 1305        | 55.1 (36.6-72.4)        | 97.4      | -0.012 (0.161)  | 0.988 (0.721-1.355)  | 0.940      |           |
| South Asia              | 4       | 630         | 36.0 (30.8-41.6)        | 33.6      | -0.182 (0.175)  | 0.834 (0.592-1.175)  | 0.297      |           |
| East Asia               | 0       | 0           | -                       | -         | -               | -                    | -          |           |
| <i>Risk of bias</i>     |         |             |                         |           |                 |                      |            |           |
| High                    | 6       | 1490        | 62.9 (37.8-82.5)        | 98.4      | ref             | ref                  | ref        | 0.00      |
| Moderate                | 6       | 1051        | 44.8 (33.6-56.6)        | 92.0      | -0.120 (0.131)  | 0.887 (0.686-1.147)  | 0.358      |           |
| Low                     | 1       | 312         | 26.9 (22.3-32.1)        | -         | -0.298 (0.242)  | 0.742 (0.462-1.193)  | 0.218      |           |

|                         |    |      |                  |      |                |                     |       |      |
|-------------------------|----|------|------------------|------|----------------|---------------------|-------|------|
| <b>Sample size</b>      | 13 | 2853 | -                | -    | 0.001 (0.001)  | 1.001 (0.999-1.003) | 0.197 | 5.68 |
| <b>Physical</b>         |    |      |                  |      |                |                     |       |      |
| <b>Year</b>             |    |      |                  |      |                |                     |       |      |
| 2010 and before         | 3  | 834  | 13.5 (6.4-26.0)  | 93.1 | ref            | ref                 | ref   | 0.00 |
| After 2010              | 9  | 1713 | 23.0 (12.7-38.1) | 97.1 | 0.122 (0.126)  | 1.130 (0.883-1.446) | 0.331 |      |
| <b>Infertility Type</b> |    |      |                  |      |                |                     |       |      |
| Primary                 | 7  | 994  | 22.1 (9.7-42.8)  | 97.1 | ref            | ref                 | ref   | 0.00 |
| Primary or secondary    | 4  | 1153 | 20.8 (12.6-32.5) | 93.8 | -0.035 (0.127) | 0.966 (0.753-1.239) | 0.784 |      |
| <b>Region</b>           |    |      |                  |      |                |                     |       |      |
| Africa                  | 2  | 612  | 35.9 (14.6-64.8) | 97.9 | ref            | ref                 | ref   | 3.33 |
| West Asia               | 6  | 1305 | 21.4 (9.3-42.0)  | 97.7 | -0.113 (0.152) | 0.893 (0.663-1.203) | 0.458 |      |
| South Asia              | 4  | 630  | 11.8 (8.5-16.2)  | 41.2 | -0.239 (0.161) | 0.787 (0.574-1.080) | 0.138 |      |
| East Asia               | 0  | 0    | -                | -    | -              | -                   | -     |      |
| <b>Risk of bias</b>     |    |      |                  |      |                |                     |       |      |
| High                    | 6  | 1490 | 20.0 (10.2-35.6) | 97.1 | ref            | ref                 | ref   | 0.00 |
| Moderate                | 5  | 745  | 19.6 (4.9-53.3)  | 98.0 | 0.008 (0.127)  | 1.008 (0.786-1.293) | 0.991 |      |
| Low                     | 1  | 312  | 23.4 (19.0-28.4) | -    | 0.002 (0.225)  | 1.002 (0.645-1.557) | 0.953 |      |
| <b>Sample size</b>      | 12 | 2547 | -                | -    | 0.000 (0.000)  | 1.000 (0.999-1.001) | 0.739 | 0.00 |
| <b>Sexual</b>           |    |      |                  |      |                |                     |       |      |
| <b>Year</b>             |    |      |                  |      |                |                     |       |      |
| 2010 and before         | 2  | 434  | 6.0 (1.2-24.6)   | 86.7 | ref            | ref                 | ref   | 0.00 |
| After 2010              | 9  | 1713 | 13.4 (7.0-24.2)  | 96.1 | 0.131 (0.157)  | 1.140 (0.838-1.551) | 0.406 |      |
| <b>Infertility Type</b> |    |      |                  |      |                |                     |       |      |
| Primary                 | 7  | 994  | 10.9 (3.9-26.8)  | 96.6 | ref            | ref                 | ref   | 0.00 |
| Primary or secondary    | 4  | 1153 | 12.9 (5.9-25.8)  | 94.9 | -0.013 (0.131) | 0.987 (0.962-1.013) | 0.923 |      |
| <b>Region</b>           |    |      |                  |      |                |                     |       |      |
| Africa                  | 2  | 612  | 25.3 (5.3-67.0)  | 98.7 | ref            | ref                 | ref   | 0.00 |
| West Asia               | 6  | 1305 | 11.0 (4.3-25.5)  | 96.9 | -0.086 (0.165) | 0.918 (0.664-1.268) | 0.603 |      |
| South Asia              | 3  | 230  | 5.7 (3.3-9.5)    | 0.0  | -0.228 (0.185) | 0.796 (0.554-1.144) | 0.217 |      |
| East Asia               | 0  | 0    | -                | -    | -              | -                   | -     |      |
| <b>Risk of bias</b>     |    |      |                  |      |                |                     |       |      |
| High                    | 5  | 1090 | 16.5 (8.4-29.8)  | 95.2 | ref            | ref                 | ref   | 0.00 |
| Moderate                | 5  | 745  | 7.2 (0.9-40.5)   | 97.3 | -0.057 (0.139) | 0.945 (0.719-1.240) | 0.680 |      |
| Low                     | 1  | 312  | 11.9 (8.7-15.9)  | -    | -0.094 (0.239) | 0.910 (0.570-1.454) | 0.694 |      |
| <b>Sample size</b>      | 11 | 2147 | -                | -    | 0.001 (0.001)  | 1.001 (1.000-1.002) | 0.257 | 2.70 |

Random-effects meta-regression model with restricted maximum likelihood (REML) method was used to conduct meta-regression.

**Table S14: Subgroup analysis and univariate meta-regression of the lifetime overall prevalence rates across three commonly used tools**

|                                       | Studies | Sample size | Prevalence (95% CI) (%) | $I^2$ (%) | Meta-regression |                     |            | $R^2$ (%) |
|---------------------------------------|---------|-------------|-------------------------|-----------|-----------------|---------------------|------------|-----------|
|                                       |         |             |                         |           | $\beta$ (SE)    | OR (95% CI)         | $p$ -value |           |
| Revised Conflict Tactics Scales       | 1       | 379         | 88.9 (85.3-91.7)        | -         | ref             | ref                 | ref        | 54.27     |
| Modified Abuse Assessment Screen      | 4       | 934         | 20.5 (7.4-45.6)         | 97.2      | -0.606 (0.215)  | 0.546 (0.358-0.832) | 0.005      |           |
| WHO Violence Against Women instrument | 3       | 400         | 63.5 (37.6-83.5)        | 95.6      | -0.271 (0.223)  | 0.763 (0.493-1.181) | 0.225      |           |

**Table S15: Lifetime IPV prevalence between infertile women and fertile women**

|                                                 | <b>Infertile group</b> | <b>Fertile group</b> | <b>OR (95% CI)</b>          |
|-------------------------------------------------|------------------------|----------------------|-----------------------------|
| <b><i>Overall violence</i></b>                  |                        |                      |                             |
| Leung et al., 2005 <sup>3</sup>                 | 9/500 ( 1.8%)          | 105/1114 (9.4%)      | 0.176 (0.088, 0.351)        |
| Rahebi et al., 2019 <sup>18</sup>               | 167/200 (83.5%)        | 102/200 (51.0%)      | 4.862 (3.054, 7.741)        |
| Poornowrooz et al., 2019 <sup>23</sup>          | 83/147 (56.5%)         | 71/199 (35.7%)       | 2.338 (1.511, 3.617)        |
| <b>Subgroup total (<math>I^2=96.8\%</math>)</b> |                        |                      | <b>1.287 (0.244, 6.789)</b> |
| <b><i>Psychological violence</i></b>            |                        |                      |                             |
| Dhont et al., 2011 <sup>8</sup>                 | 84/312 (26.9%)         | 47/312 (15.1%)       | 2.077 (1.395, 3.094)        |
| Rahebi et al., 2019 <sup>18</sup>               | 140/200 (70.0%)        | 90/200 (45.0%)       | 2.852 (1.890, 4.302)        |
| Ghoneim et al., 2021 <sup>22</sup>              | 126/306 (41.2%)        | 162/332 (48.8%)      | 0.735 (0.537, 1.005)        |
| Poornowrooz et al., 2019 <sup>23</sup>          | 77/147 (52.4%)         | 65/199 (32.7%)       | 2.268 (1.462, 3.517)        |
| <b>Subgroup total (<math>I^2=91.5\%</math>)</b> |                        |                      | <b>1.755 (0.905, 3.403)</b> |
| <b><i>Physical violence</i></b>                 |                        |                      |                             |
| Dhont et al., 2011 <sup>8</sup>                 | 73/312 (23.4%)         | 49/312 (15.7%)       | 1.639 (1.097, 2.451)        |
| Rahebi et al., 2019 <sup>18</sup>               | 136/200 (68.0%)        | 84/200 (42.0%)       | 2.935 (1.950, 4.416)        |
| Poornowrooz et al., 2019 <sup>23</sup>          | 50/147 (34.0%)         | 46/199 (23.2%)       | 1.714 (1.067, 2.755)        |
| <b>Subgroup total (<math>I^2=57.4\%</math>)</b> |                        |                      | <b>2.033 (1.393 2.966)</b>  |
| <b><i>Sexual violence</i></b>                   |                        |                      |                             |
| Dhont et al., 2011 <sup>8</sup>                 | 31/312 (11.9%)         | 8/312 ( 2.6%)        | 4.192 (1.895, 9.274)        |
| Rahebi et al., 2019 <sup>18</sup>               | 120/200 (60.0%)        | 71/200 (35.5%)       | 2.725 (1.818, 4.086)        |
| Poornowrooz et al., 2019 <sup>23</sup>          | 40/147 (27.2%)         | 35/199 (17.6%)       | 1.752 (1.047, 2.931)        |
| <b>Subgroup total (<math>I^2=45.0\%</math>)</b> |                        |                      | <b>2.547 (1.668, 3.890)</b> |

Note: Omoaregba et al., 2011<sup>9</sup> was a case-control study between infertile group and fertile group, but only reported the IPV prevalence in the infertile group. Therefore, the study was excluded in this step.

## References

1. Moher D, Liberati A, Tetzlaff J, Altman DG, Grp P. Preferred reporting items for systematic reviews and meta-analyses: the PRISMA statement. *Bmj-Brit Med J* 2009; **339**: b2535.
2. Hoy D, Brooks P, Woolf A, et al. Assessing risk of bias in prevalence studies: modification of an existing tool and evidence of interrater agreement. *J Clin Epidemiol* 2012; **65**(9): 934-9.
3. Leung TW, Leung WC, Ng EH, Ho PC. Quality of life of victims of intimate partner violence. *Int J Gynaecol Obstet* 2005; **90**(3): 258-62.
4. Sami N, Ali TS. Psycho-social consequences of secondary infertility in Karachi. *J Pak Med Assoc* 2006; **56**(1): 19-22.
5. Li Y, Cheng Y, Huang N, et al. Current Situation of Domestic Violence among Infertile Couples in Rural Areas of Dengfeng City. *Maternal and Child Health Care of China* 2005; **20**(023): 3128-30.
6. Guo X, Cheng Y, Huang N, et al. Analysis on situation and influence factors of domestic violence among infertility couples. *Chinese Journal of Public Health* 2006; **22**(5): 552-4.
7. Yildizhan R, Adali E, Kolusari A, Kurdoglu M, Yildizhan B, Sahin G. Domestic violence against infertile women in a Turkish setting. *Int J Gynaecol Obstet* 2009; **104**(2): 110-2.
8. Dhont N, van de Wijgert J, Coene G, Gasarabwe A, Temmerman M. 'Mama and papa nothing': living with infertility among an urban population in Kigali, Rwanda. *Hum Reprod* 2011; **26**(3): 623-9.
9. Omoaregba JO, James BO, Lawani AO, Morakinyo O, Olotu OS. Psychosocial characteristics of female infertility in a tertiary health institution in Nigeria. *Ann Afr Med* 2011; **10**(1): 19-24.
10. Edirne T, Arica SG, Gucuk S, et al. Use of complementary and alternative medicines by a sample of Turkish women for infertility enhancement: a descriptive study. *BMC Complementary and Alternative Medicine* 2010; **10**: 11.
11. Ardabili HE, Moghadam ZB, Salsali M, Ramezanzadeh F, Nedjat S. Prevalence and risk factors for domestic violence against infertile women in an Iranian setting. *Int J Gynaecol Obstet* 2011; **112**(1): 15-7.
12. Aduloju PO, Olagbuji NB, Olofinbiyi AB, Awoleke JO. Prevalence and predictors of intimate partner violence among women attending infertility clinic in south-western Nigeria. *Eur J Obstet Gynecol Reprod Biol* 2015; **188**: 66-9.
13. Farzadi L, Ghasemzadeh A, Asl ZB, Mahini M, Shirdel H. Intimate Partner Violence against Infertile Women. *Journal of Clinical Research & Governance* 2014; **3**(2): 147-51.
14. Iliyasu Z, Galadanci HS, Abubakar S, et al. Phenotypes of intimate partner violence among women experiencing infertility in Kano, Northwest Nigeria. *Int J Gynaecol Obstet* 2016; **133**(1): 32-6.
15. Sahin S, Ilcioglu K, Unsal A. Domestic violence and anxiety levels in infertile women. *Cukurova Med J* 2018; **43**(4): 777-84.
16. Satheesan S, Satyanarayana V. Quality of marital relationship, partner violence, psychological distress, and resilience in women with primary infertility. *Int J Community Med Public Health* 2018; **5**(2): 734-9.
17. Akpinar F, Yilmaz S, Karahanoglu E, et al. Intimate partner violence in Turkey among women with female infertility. *Sexual and Relationship Therapy* 2019; **34**(1): 3-9.
18. Rahebi SM, Rahnavardi M, Rezaie-Chamani S, Nazari M, Sabetghadam S. Relationship between domestic violence and infertility. *East Mediterr Health J* 2019; **25**(8): 537-42.



19. Alijani F, Khosravi A, Mousavi M, Delarosa V. The Associated Factors of Domestic Violence against Infertile Women. *Journal of Research Development in Nursing and Midwifery* 2019; **16**(2): 61-70.
20. Bondade S, Iyengar RS, Shivakumar BK, Karthik KN. Intimate Partner Violence and Psychiatric Comorbidity in Infertile Women - A Cross-Sectional Hospital Based Study. *Indian J Psychol Med* 2018; **40**(6): 540-6.
21. Sis Çelik A, Kirca N. Prevalence and risk factors for domestic violence against infertile women in a Turkish setting. *Eur J Obstet Gynecol Reprod Biol* 2018; **231**: 111-6.
22. Ghoneim HM, Taha OT, Ibrahim ZM, Ahmed AA. Violence and sexual dysfunction among infertile Egyptian women. *J Obstet Gynaecol Res* 2021; **47**(4): 1572-8.
23. Poornowrooz N, Jamali S, Haghbeen M, Javadpour S, Sharifi N, Mosallanezhad Z. The Comparison of Violence and Sexual Function between Fertile and Infertile Women: A Study from Iran. *Journal of Clinical and Diagnostic Research* 2019; **13**(1): QC9-QC11.
24. Coşkuner Potur D, Onat G, Doğan Merih Y. An evaluation of the relationship between violence exposure status and personality characteristics among infertile women. *Health Care Women Int* 2019; **40**(11): 1135-48.
25. Ghaly AS, Essa RM, Yassin ST. Intimate Partner Violence against Infertile Women. *IOSR Journal of Nursing and Health Science* 2019; **8**(4): 10-25.
26. Silwal A, Thapa B. Prevalence of Domestic Violence among Infertile Women attending Subfertility Clinic of a Tertiary Hospital. *JNMA J Nepal Med Assoc* 2020; **58**(226): 372-6.
27. Nabi J, Wani RA, Dar SA, Majeed N. A Cross Sectional Study on Psychiatric Morbidity and Intimate Partner Violence in Treatment Seeking Infertile Women Visiting a Tertiary Care Hospital. *International Journal of Contemporary Medical Research* 2020; **7**(8): H1-H5.
28. Akyüz A, Seven M, Sahiner G, Bilal B. Studying the effect of infertility on marital violence in Turkish women. *Int J Fertil Steril* 2013; **6**(4): 286-93.
29. Akyüz A, Sahiner G, Seven M, Bakır B. The Effect of Marital Violence on Infertility Distress among A Sample of Turkish Women. *Int J Fertil Steril* 2014; **8**(1): 67-76.
30. Taebi M, Gandomani SJ, Nilforoushan P, GholamiDehaghi A. Association between infertility factors and non-physical partner abuse in infertile couples. *Iran J Nurs Midwifery Res* 2016; **21**(4): 368-71.
31. Sheikhan Z, OZgoli G, Azar M, Alavimajd H. Domestic violence in Iranian infertile women. *Med J Islam Repub Iran* 2014; **28**: 152.
32. Mansour F, Mohdy HA. Intimate Partner Violence among Women with Female Infertility. *American Journal of Nursing Research* 2018; **6**(5): 309-16.
